# Supplementary material for: Status and physiological significance of circulating adiponectin in the very old and centenarians: an observational study
Source: eLife. 2023 Sep 28;12:e86309. doi: 10.7554/eLife.86309 (PMC10564453; doi:10.7554/eLife.86309)
Supplement: Figure 1—source data 1. [file elife-86309-fig1-data1.csv]

group	sex	Adiponectin	rs4783244_num	rs11711353_num	HbA1C	DM_medi.insu	HDLC	BMI
Cent	1	16.66	0	2	5.9	0	64	NA
Cent	1	6.28	1	1	6.8	1	38	NA
Cent	1	11.78	1	0	5.9	0	56	NA
Cent	1	18.04	0	0	6.4	0	57	NA
Cent	1	12.53	0	2	5.9	0	37	18.9
Cent	1	12.12	0	0	7.8	1	62	NA
Cent	1	10.95	1	1	8.8	1	66	22.3
Cent	1	25.97	0	1	5.2	0	70	NA
Cent	1	25.16	1	1	6.2	0	50	NA
Cent	1	9.86	1	0	5.9	0	58	16.4
Cent	1	16.39	1	1	5.4	0	62	20
Cent	1	12.39	0	2	6.3	0	50	18.8
Cent	1	21.22	1	2	5.3	0	38	NA
Cent	1	6.41	1	1	8	1	48	18.3
Cent	1	21.33	0	0	5.4	0	71	NA
Cent	1	11.34	1	2	6.3	0	53	NA
Cent	1	28.26	1	1	5.5	0	40	20.2
Cent	1	15.23	1	1	5.4	0	43	NA
Cent	1	9.38	1	1	5.9	0	61	15.2
Cent	1	19.34	0	1	6	0	50	16.2
Cent	1	17.06	0	1	5.5	0	47	NA
Cent	1	4.4	1	0	5.5	0	51	NA
Cent	1	11.64	1	1	7.8	1	60	21.6
Cent	1	25.09	0	1	6.2	0	41	NA
Cent	1	18.44	2	1	5.4	0	36	NA
Cent	1	11.36	0	1	5.5	0	32	NA
Cent	1	25.39	0	0	5.5	0	45	20.4
Cent	0	32.96	1	0	5.6	0	60	NA
Cent	0	18.73	0	1	5.4	0	37	19.1
Cent	1	25.87	0	1	5.2	0	50	NA
Cent	1	11.23	1	0	5.4	0	47	NA
Cent	1	69.05	1	2	5.5	0	36	NA
Cent	1	33.58	0	1	5.4	0	64	15.4
Cent	1	21.29	0	0	5.6	0	40	NA
Cent	0	6.71	2	1	4.9	0	41	18.2
Cent	1	14.05	1	2	4.8	0	52	NA
Cent	1	13.01	1	0	5.5	0	60	14.7
Cent	1	15.69	0	0	5.2	0	60	14.2
Cent	1	5.22	1	0	9.2	1	63	NA
Cent	1	9.87	0	1	5.3	0	43	NA
Cent	1	16.93	0	0	5.6	0	41	21.7
Cent	1	17.5	0	1	5.6	0	40	NA
Cent	1	12.52	0	1	4.9	0	37	NA
Cent	0	9.14	0	1	5.7	0	34	15.9
Cent	1	27.42	0	1	5.1	0	58	17.8
Cent	1	57.84	1	1	5	0	26	NA
Cent	0	8.4	0	0	4.8	0	38	NA
Cent	1	11.48	0	0	4.7	0	36	19.1
Cent	1	33.6	0	0	5.1	0	43	20
Cent	1	34.52	1	1	5.3	0	41	NA
Cent	1	25.01	1	1	5.4	0	52	NA
Cent	0	14.53	1	0	4.9	0	52	19.7
Cent	1	13.58	1	0	5.4	0	57	18
Cent	1	21.83	2	0	6.1	0	56	NA
Cent	1	30.72	0	2	4.9	0	64	NA
Cent	1	18.71	1	1	NA	0	56	20
Cent	1	15.12	0	1	4.5	0	42	NA
Cent	1	24.31	1	0	4.2	0	49	NA
Cent	0	12.27	1	1	5.4	0	41	NA
Cent	1	21.9	1	0	5.4	0	42	NA
Cent	1	16.12	1	1	5	0	51	NA
Cent	1	14.17	1	0	5.4	0	34	NA
Cent	1	14.41	0	0	5.2	0	47	15.8
Cent	1	18.15	2	1	5.3	0	36	NA
Cent	1	15.32	1	2	5.4	0	34	18.8
Cent	1	15.21	0	1	5.3	0	32	NA
Cent	1	13.1	1	1	5.3	0	42	21.9
Cent	1	10.32	1	0	5.9	0	48	NA
Cent	1	11.66	1	1	5.3	0	36	NA
Cent	1	10.8	1	2	5.1	0	36	NA
Cent	0	14.28	1	1	5.1	0	32	NA
Cent	1	4.66	1	0	NA	0	28	17.9
Cent	1	33.02	0	1	5.2	0	77	16
Cent	1	31.57	1	1	4.8	0	52	14.4
Cent	0	17.4	2	2	5.2	0	52	NA
Cent	1	10.19	1	1	NA	0	58	24.5
Cent	0	45.48	0	1	5.5	0	48	19
Cent	1	10.08	0	1	5.9	0	18	NA
Cent	1	29.59	1	2	5.6	0	48	23.6
Cent	1	25.24	1	0	NA	0	43	NA
Cent	1	15.17	1	0	NA	0	39	20.6
Cent	1	20.28	0	0	5.6	0	62	NA
Cent	1	17.23	0	1	6.3	0	31	20.5
Cent	1	21.38	0	0	5.3	0	40	15.2
Cent	1	24.29	1	0	5.2	0	56	NA
Cent	1	11.58	0	0	5.4	0	36	16.4
Cent	1	33.33	0	0	5.3	0	76	20
Cent	1	10.56	0	1	5.1	0	39	NA
Cent	1	38.26	1	1	4.9	0	56	NA
Cent	1	25.68	1	0	5.3	0	48	16.8
Cent	1	9.73	0	1	4.6	0	31	19.2
Cent	1	30.47	0	1	5	0	49	NA
Cent	1	20.37	1	2	6.2	0	5	NA
Cent	1	18.51	1	0	5.5	0	39	NA
Cent	1	15.45	0	0	5.4	0	32	NA
Cent	1	32.49	1	1	5.3	0	28	NA
Cent	1	17.6	1	1	5.4	0	41	14.4
Cent	1	19.02	0	1	6.1	0	39	NA
Cent	1	18.13	1	1	5.9	0	32	22.5
Cent	1	16.04	0	0	5.8	0	42	25.4
Cent	1	22.55	1	1	5.2	0	48	18
Cent	1	7.35	2	0	4.5	0	48	NA
Cent	1	20.2	0	1	5.6	0	45	20.8
Cent	1	23.36	0	1	5.4	0	32	20.6
Cent	1	15.78	1	2	6	0	41	13.3
Cent	1	30.92	0	1	5.4	0	52	21.5
Cent	1	18.53	0	1	5.1	0	40	NA
Cent	1	19.1	0	1	5.4	0	39	NA
Cent	1	29.68	1	2	5.3	0	38	NA
Cent	1	31.9	1	0	5.3	0	70	NA
Cent	1	21.54	1	1	5	0	38	NA
Cent	1	94.42	1	1	5.3	0	66	20.6
Cent	1	20.41	0	1	5.6	0	49	NA
Cent	1	21.9	1	2	6.1	0	57	NA
Cent	1	6.05	2	0	10.1	0	27	NA
Cent	1	36.31	0	1	5.2	0	66	NA
Cent	1	21.87	0	1	5.8	0	27	NA
Cent	1	17.5	0	0	5.1	0	54	17.4
Cent	1	12.42	0	0	5.3	0	32	18.9
Cent	1	26.97	0	1	4.9	0	58	NA
Cent	1	14.58	1	0	5.5	0	50	17.1
Cent	1	23.62	1	1	6.1	0	78	NA
Cent	1	33.06	1	0	5.3	0	55	14.2
Cent	1	32.92	0	1	5.5	0	38	22.4
Cent	1	29.98	0	0	5.7	0	55	22.2
Cent	1	25.47	2	1	5.9	0	54	18.1
Cent	1	31.62	1	2	5.8	0	48	NA
Cent	1	14.36	1	1	5.5	0	30	17.4
Cent	1	15.83	1	0	7.2	1	33	21.8
Cent	1	16.95	2	1	5	0	43	18.5
Cent	1	51.36	0	1	4.8	0	54	23.4
Cent	1	27.13	1	1	4.9	0	36	18.6
Cent	1	54.38	1	0	5.5	0	73	NA
Cent	1	20.11	0	1	5.9	0	42	NA
Cent	0	28.23	0	1	6.1	0	45	17.5
Cent	1	22.27	1	2	6.3	0	45	20.7
Cent	1	10	1	2	4.9	0	41	21.6
Cent	1	5.28	1	0	5.3	0	45	12.4
Cent	1	8.23	0	0	5.2	0	45	17.2
Cent	1	32.3	2	1	5.4	0	51	NA
Cent	1	22.77	0	0	5.1	0	62	27.2
Cent	1	32.44	2	0	5.8	0	55	16
Cent	1	24.78	0	2	5.3	0	53	17.3
Cent	1	29.93	0	1	4.2	0	26	17.4
Cent	0	13.05	1	0	5.7	0	44	19.3
Cent	1	23.3	0	0	5.7	0	38	18.8
Cent	1	26.8	0	0	5.6	0	33	19
Cent	1	24.08	1	1	5.7	0	51	23.4
Cent	1	19.66	0	1	6.1	0	43	22.1
Cent	1	16.1	1	0	5.3	0	71	24.3
Cent	1	24.86	1	1	5.2	0	48	23.3
Cent	1	38.9	0	1	5.8	0	55	15
Cent	1	13.38	0	1	5.4	0	53	23.4
Cent	1	32.1	0	1	5.4	0	46	17.1
Cent	1	17.58	0	1	6.1	0	51	NA
Cent	1	8.09	0	2	5.3	0	37	NA
Cent	1	28.37	0	1	6	0	56	19.8
Cent	1	36.01	1	1	5.3	0	57	18.3
Cent	1	29.52	1	1	5.4	0	70	22.5
Cent	0	18.81	1	1	5.4	0	32	16.2
Cent	1	23.65	0	0	5.5	0	40	18.6
Cent	1	31.4	1	1	5.7	0	41	14.8
Cent	1	20.54	1	1	5.7	0	38	18.8
Cent	1	28.68	0	2	5.1	0	43	20.7
Cent	1	66.81	0	1	5.4	0	55	NA
Cent	1	15.22	1	1	5.4	0	29	18.4
Cent	0	14.78	0	1	6.3	0	60	NA
Cent	1	20.38	0	1	5.5	0	38	NA
Cent	1	14.91	1	1	5.3	0	34	NA
Cent	1	10.35	1	1	4.7	0	33	17.8
Cent	1	31.62	1	1	5.2	0	41	NA
Cent	1	17.38	2	1	5.6	0	51	23.3
Cent	1	15.09	2	1	5.3	0	36	17.7
Cent	1	11.9	0	1	4.9	0	42	23.8
Cent	1	19.65	0	0	5.6	0	44	21.2
Cent	1	29.47	1	1	5.3	0	51	17.9
Cent	1	14.11	1	1	5.4	0	41	NA
Cent	1	12.32	1	0	6.2	0	42	18.3
Cent	1	19.08	0	1	4.9	0	33	25.8
Cent	1	15.96	0	2	5.8	0	31	NA
Cent	1	17.57	0	1	5.8	0	34	19
Cent	0	30.51	1	1	6	0	69	17.8
Cent	0	12.28	0	0	4.9	0	50	15.1
Cent	1	17.62	0	0	5	0	40	17.9
Cent	1	2.05	0	0	5.8	0	47	20.6
Cent	0	21.19	1	0	5.4	0	57	NA
Cent	1	23.04	1	1	5.6	0	46	NA
Cent	1	17.41	1	0	5.4	0	39	15.5
Cent	1	14	0	2	5.7	0	68	NA
Cent	1	12.92	2	1	5.3	0	37	17.1
Cent	1	14.55	1	1	5.2	0	27	NA
Cent	1	7.23	1	0	5.7	0	36	NA
Cent	0	24.13	0	1	5.4	0	58	NA
Cent	1	34.4	1	2	5.4	0	40	20.7
Cent	1	21.12	0	1	6.2	0	62	20.4
Cent	1	22.58	2	1	5.2	0	43	NA
Cent	1	23.42	0	2	5.7	0	31	17.6
Cent	1	28.31	0	1	5.9	0	24	NA
Cent	0	11.01	0	1	5.8	0	35	NA
Cent	1	24.89	1	0	5	0	26	NA
Cent	0	21.43	0	0	6.4	0	18	22.4
Cent	1	13.37	1	2	5.4	0	47	15.3
Cent	1	16.15	1	1	5.5	0	53	20.5
Cent	1	12.72	1	0	5.4	0	38	12.7
Cent	1	24.33	0	0	5.4	0	53	NA
Cent	1	21.07	1	0	5.3	0	17	15.1
Cent	1	14.14	0	1	5.6	0	34	16.1
Cent	0	40.53	0	0	5	0	63	19.9
Cent	0	33.47	0	0	5.2	0	62	16.2
Cent	1	17.21	0	0	5.3	0	45	NA
Cent	1	23.65	1	0	6	0	65	17.2
Cent	1	28.83	0	0	6.3	0	62	23.9
Cent	1	22.73	0	1	5.3	0	57	NA
Cent	1	3.42	1	1	5.8	0	30	23.4
Cent	1	22.03	1	2	5.2	0	56	20.3
Cent	1	33.92	0	1	5.6	0	56	18.5
Cent	1	11.1	0	1	5.3	0	58	NA
Cent	1	21.1	2	0	5.4	0	50	NA
Cent	1	11.5	0	0	5.5	0	32	16
Cent	1	20.33	0	0	6	0	73	NA
Cent	1	12.17	1	0	5.8	0	47	NA
Cent	1	13.39	0	0	5.8	0	40	NA
Cent	1	25.57	0	0	5.7	0	48	17.3
Cent	1	16.22	0	0	5.6	0	38	16.2
Cent	1	16.71	1	1	6	0	41	NA
Cent	1	12.72	0	0	5.4	0	26	18.5
Cent	1	23.53	0	0	6.4	0	45	19
Cent	1	21.2	0	0	6	0	42	20.4
Cent	1	34.61	1	0	5.5	0	49	17.9
Cent	1	34.28	1	1	5.9	0	48	17.3
Cent	1	13.42	1	0	6.7	1	45	NA
Cent	1	12.47	1	0	5.1	0	31	NA
Cent	1	30.38	2	1	5.1	0	61	NA
Cent	1	29.11	0	1	5.6	0	46	NA
Cent	1	13.5	1	0	4.9	0	30	18
Cent	0	17.86	2	0	4.6	0	34	NA
Cent	1	22.48	1	1	5.6	0	66	15.4
Cent	1	24.05	0	1	5.7	0	40	NA
Cent	1	2.86	1	0	6	0	60	19.7
Cent	1	13.57	0	1	5.8	0	42	20.3
Cent	1	18.05	0	1	6.1	0	46	18.9
Cent	1	1.55	1	0	6.6	1	27	18.9
Cent	1	12.92	1	1	6.3	0	47	21.5
Cent	1	28.99	0	0	5	0	56	NA
Cent	1	16.82	0	0	5.1	0	40	21.8
Cent	1	15.13	1	0	5.3	0	25	21.4
Cent	1	24.09	1	0	6.1	0	34	15.2
Cent	1	13.09	0	2	5.6	0	34	18.7
Cent	1	17.97	1	2	6.5	1	51	17.6
Cent	1	25.01	1	1	5.3	0	46	19
Cent	0	17.08	1	1	5.4	0	33	NA
Cent	0	10.32	1	1	8.5	1	53	20.4
Cent	1	17.63	1	2	5.5	0	34	19.6
Cent	1	26.51	0	1	6	0	58	15.2
Cent	1	23.67	1	0	5.3	0	58	NA
Cent	1	3.72	0	1	6.1	0	44	NA
Cent	1	10.12	0	1	4.9	0	30	21.4
Cent	1	20.09	0	1	4.6	0	41	15.2
Cent	1	23.24	1	1	6.1	0	71	15.2
Cent	0	16.66	1	1	5.9	0	41	18.3
Cent	1	20.12	1	1	5.2	0	38	15.3
Cent	1	13.33	1	2	5.6	0	59	15.5
Cent	0	5.14	1	1	5.8	0	55	NA
Cent	1	35.58	1	2	5.7	0	57	17.5
Cent	1	13.86	1	2	5.8	0	34	NA
Cent	0	28.63	0	1	5.4	0	47	17
Cent	1	28.01	0	2	5	0	51	19
Cent	1	8.23	1	1	5.3	0	44	23.3
Cent	1	15.53	1	0	5.4	0	52	16.3
Cent	0	16.35	1	2	5.5	0	57	NA
Cent	1	15	0	0	5	0	39	19.5
Cent	1	9.54	0	0	5.1	0	30	15.8
Cent	1	19.45	2	1	5.2	0	33	25.1
Cent	1	22.16	0	2	5.6	0	53	16.9
Cent	1	25.11	0	1	5.1	0	43	20
Cent	1	29.01	1	2	5.1	0	45	16.2
Cent	1	38.66	0	1	5.4	0	48	NA
Cent	1	29.49	0	1	6	0	73	16.9
Cent	1	8.84	1	0	5	0	27	19.3
Cent	1	17.01	1	1	4.8	0	49	22.7
Cent	0	26.59	0	1	5.2	0	44	20.6
Cent	1	23.35	0	1	5.4	0	62	22.6
Cent	1	5.8	2	0	5.6	0	42	27.3
Cent	1	4.96	1	1	5.5	0	36	19.5
Cent	1	23.44	1	1	5.1	0	50	18.9
Cent	1	15.3	1	1	5.5	0	43	16.6
Cent	0	6.16	2	0	6.2	0	38	25
Cent	1	7.8	2	1	4.8	0	35	16.3
Cent	1	29.88	1	1	4.7	0	52	16.3
Cent	1	18.96	1	0	5.1	0	44	19.7
Cent	1	19.74	0	1	5.6	1	43	17.1
Cent	1	24.31	1	2	5.1	0	45	21.6
Cent	1	12.26	0	1	4.6	0	47	NA
Cent	1	17.39	0	2	5.4	0	40	17.8
Cent	1	13.2	0	0	5.3	0	29	16.4
Cent	1	7.69	1	0	6.2	0	50	27.9
Cent	1	25.39	0	2	6.6	1	44	16.5
Cent	1	13.16	0	2	5.4	0	42	23.1
Cent	1	9.63	0	0	4.8	0	66	17.6
Cent	1	11.82	1	0	6.2	0	50	16.1
Cent	1	14.96	0	1	5.7	0	73	NA
Cent	1	11.71	1	0	4.5	0	39	15.8
Cent	1	14.73	1	0	6.2	0	52	NA
Cent	1	12.94	1	1	5.7	0	45	NA
Cent	1	21.48	1	2	5.3	0	46	NA
Cent	1	16.01	0	0	5.5	0	42	NA
Cent	1	18.61	1	0	4.9	0	43	21.7
Cent	1	11.84	1	2	6.3	0	56	16.9
Cent	1	12.52	0	1	5.5	0	35	18.7
Cent	1	28.32	0	2	5	0	58	13.3
Cent	1	9.55	0	1	5.6	0	36	20.1
Cent	1	15.38	0	0	6.2	0	44	19.2
Cent	1	16.51	0	0	5.3	0	37	19
Cent	1	17.51	0	1	5.6	0	53	16.4
Cent	1	30.64	0	0	6.2	0	43	17.9
Cent	1	8.51	1	0	6.4	0	60	23.5
Cent	1	29.9	0	1	5.2	0	67	15.1
Cent	1	32.16	0	0	6.9	1	41	NA
Cent	1	20.6	0	0	6.1	0	36	NA
Cent	1	16.89	0	0	5.2	0	41	14.3
Cent	1	15.92	0	0	5.5	0	48	18.3
Cent	1	23.2	1	1	5.6	0	71	NA
Cent	1	20.72	1	1	5.4	0	48	18.7
Cent	0	14.46	1	2	5.8	0	45	16.5
Cent	1	28.59	1	1	4.7	0	45	NA
Cent	1	8.9	1	1	5.4	0	47	NA
Cent	1	19.1	1	2	5.1	0	38	NA
Cent	1	12.7	1	0	5.4	0	50	NA
Cent	1	15.6	0	0	5.1	0	53	NA
Cent	1	15.7	1	1	5.4	0	40	19.6
Cent	1	17.4	0	0	5.6	0	35	NA
Cent	1	10.1	1	1	5.8	0	30	18.9
Cent	1	14.7	0	1	5.2	0	36	NA
Cent	1	22.7	1	1	5.1	0	51	NA
Cent	1	17.6	0	0	5.6	0	58	21.6
Cent	1	16.1	0	2	5.2	0	47	21.2
Cent	1	22.9	0	2	5.8	0	53	21.1
Cent	1	25.5	1	1	5.3	0	49	18.8
Cent	1	24.4	1	2	5.5	0	62	NA
Cent	1	30.6	1	1	5.3	0	35	18.4
Cent	1	13.5	1	0	5.5	0	52	19.1
Cent	0	13.2	1	0	5.8	0	25	16.4
Cent	1	17.3	1	0	5.5	0	37	NA
Cent	1	8.6	1	1	5.5	0	61	NA
Cent	1	17.1	1	1	5.7	0	29	24
Cent	0	28.3	1	2	6.1	0	39	25.9
Cent	1	9.7	0	0	5.6	0	42	23.8
Cent	1	22.6	0	2	5.8	0	53	NA
Cent	1	15.1	1	0	5.1	0	43	16.1
Cent	1	10.8	0	1	5.3	0	24	22
Cent	1	9.2	1	0	5.7	0	32	29.2
Cent	0	10	1	0	5.2	0	44	17.4
Cent	1	22.1	1	2	6	0	32	NA
Cent	1	16.4	1	0	5.6	0	36	17.8
Cent	1	19.9	1	0	5.9	0	71	NA
Cent	1	24.4	0	0	5.5	0	42	17.6
Cent	1	23.6	1	1	5.1	0	50	19.1
Cent	1	20.9	0	0	5.7	0	34	23.6
Cent	1	17.6	1	0	5	0	40	17.7
Cent	1	18.4	1	1	5.1	0	55	21.5
Cent	1	15.5	0	0	4.8	0	45	NA
Cent	1	17.5	1	0	5.2	0	39	17.5
Cent	1	29.4	1	1	5.4	0	45	NA
Cent	0	13.1	0	1	4.9	0	54	15.8
Cent	1	18.5	1	2	5.5	0	45	17.1
Cent	1	20.4	0	0	5.9	0	44	23.3
Cent	0	20.8	0	0	5.6	0	46	21
Cent	1	22.7	1	0	5.6	0	40	20.7
Cent	1	17.9	2	2	5.4	0	47	25.5
Cent	1	32.6	0	0	5.3	0	41	NA
Cent	1	24.8	0	1	5.8	0	39	21.7
Cent	1	29.2	1	1	5.8	0	54	21.3
Cent	1	21.8	1	0	6	0	45	20.3
Cent	1	25.4	1	0	4.8	0	42	20.4
Cent	1	30.6	0	1	5.3	0	47	19.1
Cent	0	15.5	0	0	5.8	0	34	30.2
Cent	1	29.6	0	1	5.7	0	57	20.9
Cent	1	41.5	1	1	5	0	75	16.9
Cent	0	20.1	1	1	4.9	0	48	17.1
Cent	1	29.3	0	2	4.9	0	56	21
Cent	1	20.4	0	0	5.8	0	47	32.5
Cent	1	28.2	0	0	7.2	1	70	24.1
Cent	0	9	1	1	5.8	0	39	20.5
Cent	0	27.9	0	0	5	0	61	NA
Cent	1	7.9	1	1	5.7	0	72	18.2
Cent	1	15.9	0	1	5	0	41	13.7
Cent	1	23.1	1	1	5.2	0	37	18.3
Cent	1	14.7	1	1	5.6	0	56	24.6
Cent	1	27.9	0	1	5.8	0	46	15.7
Cent	1	6.4	2	1	5.5	0	45	19.4
Cent	1	37	1	1	5.6	0	64	16.2
Cent	1	4.6	1	0	5.4	0	47	16.2
Cent	1	34.2	0	0	6	0	54	NA
Cent	1	19.6	0	2	5.5	0	37	14.2
Cent	1	9.3	1	0	5.2	0	39	NA
Cent	1	24	0	0	5.9	0	47	17.9
Cent	1	16.1	1	1	5.1	0	60	18.3
Cent	0	12.2	2	1	5.7	0	41	NA
Cent	1	21.4	1	1	5.6	0	55	18
Cent	1	19	0	1	5.9	0	52	NA
Cent	1	25.3	1	0	5.6	0	58	16.9
Cent	1	10	0	0	5.9	0	42	18.4
Cent	1	20.5	1	1	5.5	0	60	NA
Cent	1	10	1	0	5.4	0	46	18.1
Cent	1	18.5	1	1	5.8	0	53	26.4
Cent	1	12.2	0	0	6	0	49	25.3
Cent	1	22.4	0	0	5.3	0	59	15.9
Cent	1	9.2	1	0	5.3	0	40	19.5
Cent	1	29.5	0	0	NA	0	NA	NA
Cent	1	17.6	1	0	5.5	0	54	23
Cent	1	19.4	0	1	4.9	0	48	20.1
Cent	1	10.6	0	2	6.4	0	24	NA
Cent	1	32.2	0	0	5.6	0	41	15.6
Cent	1	19.9	1	1	5.8	0	60	19.2
Cent	1	16	1	1	5.5	0	60	14.5
Cent	1	15.2	1	1	5.7	0	53	24.4
Cent	1	9.8	0	2	6.1	0	34	23
Cent	1	24.7	0	1	5.4	0	40	16.2
Cent	1	6.9	1	1	5.8	0	56	20.4
Cent	1	21.9	1	1	6	0	76	NA
Cent	1	5.6	0	1	6.2	0	44	NA
Cent	1	12.1	1	1	5.7	0	70	25.9
Cent	1	25.1	0	1	5.4	0	54	20.3
Cent	1	28.5	1	1	5.1	0	61	22.8
Cent	0	22.4	0	1	5.7	0	26	21.6
Cent	1	15.4	0	2	5.9	0	44	NA
Cent	1	21.3	0	1	5.6	0	73	21.6
Cent	1	12.5	1	1	5.2	0	37	15.5
Cent	1	10.8	1	2	4.6	0	35	NA
Cent	1	23.3	1	2	6.2	0	64	15.5
Cent	1	19.7	1	1	5.3	0	42	17.4
Cent	1	29.6	0	2	5	0	50	19.9
Cent	1	10.9	0	1	6.5	1	18	NA
Cent	1	23.9	1	1	5.3	0	49	18.4
Cent	1	8.4	0	1	5.3	0	37	18.8
Cent	1	33.01	1	1	5.9	0	60	18.7
Cent	1	16.4	0	1	5.2	0	54	24
Cent	1	17.5	1	1	5.3	0	41	17.4
Cent	1	24.1	0	1	5.5	0	36	18.4
Cent	1	36.7	0	1	5.7	0	45	19
Cent	0	10.7	1	1	5.6	0	42	24.6
Cent	1	12.9	1	1	6.3	0	61	18.7
Cent	0	18.6	1	1	5.8	0	51	21.9
Cent	1	44.3	0	1	6.1	0	83	16.6
Cent	0	14.5	1	1	5.3	0	46	17.3
Cent	1	8.9	0	0	5.5	0	40	NA
Cent	1	37.3	0	1	6	0	96	21.6
Cent	1	14.9	1	2	5.7	0	63	18.8
Cent	1	15.5	1	1	5.6	0	78	20.1
Cent	1	10.9	2	1	6.2	0	78	22.5
Cent	0	18.7	0	0	6.1	0	56	18.7
Cent	0	12.9	2	0	5.9	0	113	15.3
Cent	1	42.1	1	1	5.4	0	76	17.1
Cent	1	26.1	1	1	5.6	0	90	15.3
Cent	0	11.4	0	1	5.4	0	55	17.2
Cent	1	12.8	0	2	5.7	0	51	19.3
Cent	1	24	0	0	5.7	0	47	NA
Cent	1	48.7	0	1	6.2	0	58	15.2
Cent	1	20.5	0	1	6.5	1	63	16.8
Cent	1	26.2	0	0	5.5	0	46	23.8
Cent	0	19.9	0	1	5.8	0	69	16
Cent	0	20.8	0	2	6.4	0	55	20.7
Cent	1	25.9	1	2	5.5	0	79	20.1
Cent	0	4.3	1	1	5.3	0	30	27.5
Cent	1	22.1	0	1	5.4	0	67	NA
Cent	1	23.6	0	0	5.1	0	59	25.2
Cent	1	20.3	0	1	5.8	0	55	24.4
Cent	1	12.4	1	0	5.7	0	52	26
Cent	0	30.3	0	1	5.4	0	57	17.4
Cent	0	37.5	0	1	5.4	0	66	NA
Cent	1	17.6	0	1	4.8	0	46	19.1
Cent	1	9.9	0	1	5.2	0	55	23.8
Cent	1	21.7	1	1	5.7	0	56	20.5
Cent	1	15.3	0	0	5.3	0	50	25.3
Cent	1	32.3	2	2	5	0	69	14.8
Cent	1	14.2	2	0	5.4	0	61	23.4
Cent	1	20.5	0	0	5.6	0	50	20
Cent	1	28.3	0	0	5.5	0	64	24
Cent	1	7.7	1	1	5.5	0	50	23.4
Cent	1	25.6	1	1	4.8	0	68	19.4
Cent	1	24.9	1	1	5	0	67	NA
Cent	1	20.5	1	1	NA	0	57	NA
Cent	1	23.1	0	1	5	0	38	NA
Cent	1	28	0	1	5.2	0	61	19.4
Cent	1	14.1	1	1	5.3	0	37	18.8
Cent	1	27.4	0	0	5.4	0	38	NA
Cent	1	17.5	2	0	5.5	0	47	NA
Cent	1	20.4	NA	NA	5.2	0	34	17.4
Cent	1	10.3	0	1	5.1	0	40	13.1
Cent	0	36.3	0	2	5.4	0	45	19
Cent	1	19.9	0	0	5.5	0	27	NA
Cent	0	27.2	0	1	5.8	0	42	23.5
Cent	1	37.3	0	2	5.6	0	36	19.6
Cent	1	25.4	0	0	6.2	0	45	13.8
Cent	0	37.7	1	1	5.8	0	68	23.6
Cent	0	28.1	1	1	5.5	0	62	NA
Cent	1	79.3	1	0	6.7	1	58	18.4
Cent	0	11.7	1	0	6	0	43	19.6
Cent	1	26.1	0	1	5.2	0	62	17
Cent	1	16.9	1	1	7	1	39	20.9
Cent	1	25	1	1	5.4	0	81	17.6
Cent	1	13.2	1	0	5.1	0	38	16.8
Cent	0	30.2	0	1	4.9	0	47	21.3
Cent	1	16.1	1	0	5.2	0	45	NA
Cent	1	13.7	1	0	5.3	0	45	19.6
Cent	1	24	0	2	5.2	0	46	NA
Cent	1	17.2	1	0	5.5	0	53	26.4
Cent	1	36.2	1	1	5.6	1	49	NA
Cent	1	14.8	2	0	5.7	0	41	23.1
Cent	1	18.4	2	1	5.3	0	55	NA
Cent	1	19.7	0	0	6.7	1	50	16
Cent	1	32.2	0	0	5.2	0	49	NA
Cent	1	23	1	1	6	0	47	21.1
Cent	0	21.3	0	0	5.4	0	40	20.4
Cent	0	15	2	1	5.9	0	75	NA
Cent	1	22.6	0	1	5.2	0	41	16.8
Cent	0	10.1	1	2	NA	0	40	18.6
Cent	0	19.5	0	0	4.8	0	46	19.1
Cent	1	44.4	1	1	5.8	0	47	16.7
Cent	1	19.2	NA	NA	5.9	0	38	18.8
Cent	1	26.7	1	2	5.5	0	61	20.5
Cent	1	22.8	1	1	5.3	0	42	16.3
Cent	1	25.4	0	1	5.5	0	44	20.2
Cent	1	31.7	1	1	5.6	0	54	17.3
Cent	1	21.7	0	0	6	0	55	NA
Cent	1	24.2	0	0	5.1	0	85	16.6
Cent	1	34.6	0	1	5.3	0	47	16.9
Cent	1	22.5	0	0	5.3	0	61	14.6
Cent	1	30	0	1	5.3	0	44	24
Cent	1	14.7	1	2	5.3	0	53	NA
Cent	1	25.1	0	1	5.4	0	44	17.4
Cent	1	27.5	0	1	5.3	0	65	15.8
Cent	0	9.5	1	0	5.8	0	42	22.1
Cent	1	26.4	0	0	5.2	0	44	15.4
Cent	0	15.1	1	1	6	0	35	18.9
Cent	1	12.5	0	0	5.8	0	39	18.9
Cent	0	7.4	1	1	6.1	0	33	25.9
Cent	1	14.3	1	1	6.3	0	41	NA
Cent	1	30.2	0	0	5.6	0	69	NA
Cent	1	20.5	1	1	5.6	0	51	19.1
Cent	1	27.7	1	1	5.7	0	43	18.5
Cent	1	5.4	1	1	5.2	0	41	NA
Cent	1	20	0	1	5.9	0	42	NA
Cent	1	25.4	0	0	5.1	0	57	NA
Cent	1	19	1	1	5.8	0	77	24.4
Cent	0	15.4	0	0	6.8	1	44	NA
Cent	1	20.1	1	1	5	0	29	19.6
Cent	1	25.8	1	2	5.8	0	43	19.8
Cent	1	21.3	0	0	5.8	0	34	18.9
Cent	1	16.4	1	1	5.7	0	23	18.3
Cent	1	16.6	0	0	5.3	0	32	21
Cent	1	13.3	1	1	5.3	0	36	14.5
Cent	1	15.1	1	1	5.4	0	60	NA
Cent	1	22.7	0	0	5	0	50	NA
Cent	0	14.8	1	0	5.8	0	36	20.2
Cent	0	16.6	0	0	5.6	0	38	NA
Cent	1	10.7	2	1	5.4	0	56	NA
Cent	0	7.4	0	0	5.9	0	38	24.8
Cent	1	26.9	0	1	5.5	0	49	18.3
Cent	1	14	0	1	6.2	1	54	21.8
Cent	1	25.3	0	0	5.6	0	66	21.8
Cent	1	21.4	0	0	5.8	0	47	NA
Cent	1	12.5	0	0	7.3	1	44	19.5
Cent	1	39.9	0	1	4.9	0	77	NA
Cent	0	17.3	0	0	5.3	0	61	18.2
Cent	1	18.9	1	1	5.5	0	51	16.9
Cent	1	21.4	1	2	5.1	0	66	19.2
Cent	1	12.9	0	2	5.1	0	42	NA
Cent	1	11.2	1	1	5.5	0	41	18.6
Cent	1	6.6	1	0	6.8	1	38	NA
Cent	1	11.6	1	0	5.3	0	39	NA
Cent	1	19	0	1	5.3	0	52	20.5
Cent	1	11.8	0	1	5.1	0	29	NA
Cent	0	16.6	1	2	5.2	0	62	24.3
Cent	0	30.5	1	2	5.5	0	47	NA
Cent	1	14	0	0	5.5	0	47	NA
Cent	1	13.7	1	1	5.1	0	38	15.6
Cent	1	29.7	0	1	5.3	0	46	21.6
Cent	1	12.2	1	1	6.5	1	49	19
Cent	1	12.2	1	0	6	0	59	16.6
Cent	0	12.3	0	1	6.1	0	44	22.2
Cent	1	12	0	1	5.5	0	64	27.8
Cent	1	61.1	0	1	5.5	0	64	18.6
Cent	0	20	0	1	5.7	0	66	25.2
Cent	0	6.9	2	0	6.1	0	51	NA
Cent	1	53.8	0	1	5	0	68	20.4
Cent	1	13.7	0	1	5.7	0	58	16.2
Cent	0	8.7	1	1	5.9	0	50	17.7
Cent	0	8.1	1	0	6	0	45	20.4
Cent	1	14.8	1	1	5.6	0	95	19.4
Cent	0	2.1	0	0	6.7	1	77	20.4
Cent	1	3.1	0	1	6	0	51	NA
Cent	1	18.5	0	0	5.9	0	75	25.6
Cent	1	17.4	2	0	5.5	0	75	23.4
Cent	1	11.8	1	1	5.7	0	44	21.9
Cent	1	13.6	0	1	5.4	0	48	NA
Cent	1	21.7	0	0	6.3	0	37	20.6
Cent	0	7.2	1	1	7.4	1	61	27.5
Cent	1	25.3	1	1	5.7	0	47	NA
Cent	1	14.3	1	0	6	0	52	NA
Cent	0	10.8	1	1	5.9	0	57	20.4
Cent	1	21.2	0	2	5.2	0	62	19.5
Cent	1	18.2	1	0	6.4	0	58	16.4
Cent	1	14.1	1	1	4.8	0	44	18.9
Cent	0	16.6	1	0	5.6	0	44	NA
Cent	1	11.3	1	0	5.5	0	50	19.4
Cent	1	36.3	2	0	6	0	58	17.1
Cent	0	12.5	1	0	5.5	0	47	20.6
Cent	1	10.3	2	2	6.5	1	37	NA
Cent	0	12.1	1	0	5.9	0	86	20
Cent	1	26.3	0	1	5.6	0	47	17.8
Cent	0	12.4	1	0	5.6	0	44	NA
Cent	1	26.9	0	1	5.6	0	61	NA
Cent	0	10.3	1	1	5.7	0	34	20
Cent	1	13.8	1	0	6	0	56	NA
Cent	0	16.5	0	0	7.2	1	50	NA
Cent	0	24.3	0	1	5.8	0	66	15.1
Cent	1	12.8	1	1	5.5	0	45	23.4
Cent	0	16	0	1	5.1	0	48	17.2
Cent	0	19.2	1	0	5.1	0	47	19.8
Cent	0	17.6	1	1	4.8	0	71	17.5
Cent	0	9.2	0	1	5.5	0	50	NA
Cent	1	26.6	1	1	5.8	0	62	16.3
Cent	1	16.3	0	0	5.8	0	66	20.3
Cent	0	6.2	2	0	5.6	0	51	19.2
Cent	1	15.1	0	1	5.5	0	45	18.9
Cent	0	22.2	0	1	6	0	70	16.2
Cent	1	29.9	0	1	5.5	0	44	24.3
Cent	1	15.3	0	1	5.9	0	44	18.7
Cent	1	12.6	0	2	6.1	0	40	17.7
Cent	1	4.2	1	1	5.5	0	31	21.9
Cent	1	14	0	1	5.5	0	43	21.4
Cent	0	17.8	0	1	5.6	0	44	23.4
Cent	1	10.4	0	1	5.8	0	39	NA
Cent	1	22.8	1	1	5.8	0	43	18.7
Cent	1	22.4	1	1	5.6	0	52	24.9
Cent	0	23.9	0	1	5.6	0	53	NA
Cent	0	22.4	1	0	5.4	0	58	14.3
Cent	1	11	2	1	5.2	0	47	21
Cent	1	23.2	1	0	5	0	49	NA
Cent	0	14.2	1	1	5	0	47	16.4
Cent	1	18.5	0	2	5.9	0	71	17.5
Cent	1	18.5	0	2	5.5	0	62	17.6
Cent	1	37.6	0	0	5.5	0	51	21.4
Cent	0	34.5	1	0	5.2	0	66	23.4
Cent	1	9.6	0	1	5.6	0	36	NA
Cent	1	17.1	0	1	5.3	0	45	22.3
Cent	1	11.3	1	1	5.6	0	36	19.3
Cent	1	8.2	0	0	6.8	1	44	NA
Cent	1	13.2	0	2	5.4	0	48	20.8
Cent	1	38.4	0	0	5.5	0	56	16.9
Cent	1	18.2	0	2	6	0	56	16.8
Cent	0	28.1	0	2	5.3	0	71	19.4
Cent	1	14.2	2	2	5	0	38	28.4
Cent	0	16.6	0	1	5.7	0	88	25.1
Cent	0	24.1	0	1	5.3	0	73	19.2
Cent	1	14.8	1	1	5.7	0	53	NA
Cent	1	16.9	1	1	5.5	0	62	14.8
Cent	1	6	1	2	NA	0	47	NA
Cent	0	12.8	1	2	5.9	0	51	22.2
Cent	1	26.7	1	0	5.1	0	54	NA
Cent	1	46.2	0	0	5.1	0	64	NA
Cent	0	22.6	0	1	5.8	0	50	20.7
Cent	0	14.9	0	0	5.5	0	69	22.3
Cent	0	13.5	0	0	6.3	0	36	NA
Cent	1	26.2	1	0	5.8	0	58	16.8
Cent	1	10.4	0	0	6.1	0	45	21.1
Cent	1	23.2	1	0	5.9	0	80	16.3
Cent	1	13.9	0	0	6.1	0	58	16.3
Cent	1	9.5	1	0	5.4	0	39	29.7
Cent	1	46.6	0	1	5.1	0	68	NA
Cent	1	18.5	1	1	4.8	0	67	25.1
Cent	1	18.6	2	0	5.3	0	38	17.1
Cent	1	24.1	1	1	5.3	0	59	21.2
Cent	1	27.5	0	1	5.3	0	46	19.4
Cent	1	28.2	1	1	5.5	0	51	15.4
Cent	1	31.2	0	1	5.4	1	58	16.3
Cent	1	37.1	0	1	5.3	0	46	15.7
Cent	1	35.5	0	0	6.1	0	57	NA
Cent	1	30.7	0	0	5.9	0	48	19.9
Cent	1	16.6	1	0	6.5	1	48	NA
Cent	1	23.9	0	1	5.7	0	44	NA
Cent	1	9	0	0	5.6	0	35	23.4
Cent	1	17.3	1	2	5.8	0	53	18.5
Cent	0	22.2	0	0	5.7	0	41	NA
Cent	1	21.5	0	1	6.1	0	58	20
Cent	1	31.3	0	1	8.2	1	35	20.4
Cent	1	32.7	0	0	5.5	0	56	19.7
Cent	1	28.3	1	1	5.1	0	59	19.8
Cent	1	5.3	1	0	5.2	0	62	NA
Cent	0	15.8	0	0	5.6	0	48	19.4
Cent	1	14.6	0	1	6.3	0	58	23.9
Cent	1	18.5	0	0	5.2	0	51	15.3
Cent	1	16.3	2	0	6.1	0	41	26.2
Cent	1	13.6	0	0	5	0	42	22.3
Cent	1	11.3	1	0	5.8	0	26	20.4
Cent	1	16.2	0	2	4.8	0	50	23.2
Cent	1	19	0	0	5.7	0	44	20
Cent	1	24.3	1	0	5.4	0	39	NA
Cent	0	13.3	2	1	5.8	0	58	17.1
Cent	0	14.4	2	0	5.6	0	44	17.5
Cent	1	16.2	1	0	5	0	25	24.9
Cent	1	19.8	2	1	5.2	0	51	NA
Cent	1	16.8	0	1	5.6	0	28	17.8
Cent	0	13.3	1	1	5.5	0	50	19.2
Cent	1	26.7	1	1	5.8	0	65	22.3
Cent	1	27	0	0	5.9	0	44	22.6
Cent	1	6.7	0	1	6.5	1	20	NA
Cent	1	20.9	0	1	6	0	50	17.9
Cent	1	13	1	1	5.4	0	43	16
Cent	1	29.7	1	2	NA	0	53	18.1
Cent	1	13.5	0	1	5.8	0	60	NA
Cent	1	7.5	1	1	5.4	0	28	20.8
Cent	0	23.2	1	0	5.2	0	55	NA
Cent	1	19	NA	NA	6.2	0	70	26
Cent	1	13.5	1	2	5.4	0	56	25.5
Cent	1	7.7	0	0	5.5	0	39	20.4
Cent	1	24.8	0	1	6.1	0	78	NA
Cent	0	27	1	1	4.8	0	30	17.2
Cent	1	8	1	0	5.7	0	51	24.5
Cent	1	25.1	0	1	5.3	0	36	15.6
Cent	0	15.3	2	1	5.7	0	46	NA
Cent	1	9	2	0	5.4	0	36	NA
Cent	1	18.7	1	1	5.1	0	53	19.2
Cent	1	17.3	1	1	5.9	0	54	18.9
Cent	0	20.6	1	1	5.8	0	60	NA
Cent	0	23.5	0	0	5.3	0	44	NA
Cent	0	25.2	1	0	5.3	0	45	15.6
Cent	1	13.4	1	0	5.5	0	48	NA
Cent	1	14.2	0	1	6.2	0	38	19.2
Cent	0	19.2	0	0	5.5	0	42	26.7
Cent	1	11.5	0	0	4.8	0	28	20.4
Cent	1	19.1	1	2	5.8	0	47	17.2
Cent	0	10.2	1	0	5.7	0	48	21
Cent	1	34.8	1	1	5.5	0	58	24.6
Cent	1	26.9	1	0	6.4	1	39	16.3
Cent	1	13.4	1	1	5.2	0	48	16.8
Cent	1	17.2	0	1	6.9	1	33	16.8
Cent	1	12.8	0	0	5.5	0	59	NA
Cent	0	16.7	1	2	5.6	0	55	16.2
Cent	1	19.9	0	1	5.3	0	49	18.1
Cent	1	11.6	1	0	5.2	0	33	NA
Cent	1	28.3	0	1	5.2	0	67	NA
Cent	1	11.2	1	2	4.2	0	32	NA
Cent	1	30.4	1	2	5.5	0	52	16.4
Cent	1	31.3	0	1	5.4	0	40	NA
Cent	1	18.4	1	1	5.1	0	53	14.8
Cent	1	23.2	0	2	6.2	0	44	21.2
Cent	1	15.5	1	2	5.4	0	46	24.3
Cent	1	34.1	0	0	5	0	42	15.5
Cent	1	13.9	1	0	5.5	0	39	NA
Cent	1	6.5	1	0	5	0	33	NA
Cent	1	17.9	0	0	5.1	0	43	18.2
Cent	1	22.8	0	0	4.9	0	49	NA
Cent	1	14.8	0	1	5.6	0	51	19.5
Cent	1	10.1	0	0	5.9	0	40	NA
Cent	0	19.4	0	1	6	0	83	20.8
Cent	1	20.5	0	1	5.7	0	49	23.4
Cent	1	11.4	1	1	5.1	0	41	15.7
Cent	1	9.5	1	0	9.4	1	40	20.9
Cent	1	26.7	2	2	5.2	0	49	NA
Cent	1	10.7	0	0	5.1	0	47	18.9
Cent	0	27.2	0	0	5.6	0	42	17.5
Cent	1	19.84	0	0	5.4	0	59	20.1
Cent	1	24.61	1	1	5	0	61	21.3
Cent	1	12.88	0	1	5.9	0	42	28.2
Cent	1	22.07	1	2	5.5	0	36	18.1
Cent	1	20.59	0	1	5.1	0	40	16.7
Cent	1	37.48	1	1	5.5	0	74	20.9
Cent	1	6.61	1	0	5.5	0	40	17.3
Cent	0	19	0	2	6	0	46	18.9
Cent	0	21.84	1	1	5.1	0	51	22.9
Cent	1	10.65	1	1	5.8	0	57	17.3
Cent	1	21.54	0	1	5	0	33	18.4
Cent	1	9.25	1	2	7.2	1	27	19.4
Cent	1	22.66	2	1	5.6	0	47	21.8
Cent	1	20.15	1	1	5.2	0	68	18.8
Cent	1	22.62	1	1	5	0	40	NA
Cent	1	11.97	0	0	5.1	0	35	19.5
Cent	1	23.63	1	0	5.6	0	28	NA
Cent	1	72.8	1	0	5.4	0	49	16.9
Cent	1	30.4	1	1	5.1	0	57	17.3
Cent	1	23.53	1	1	5.9	0	35	21.9
Cent	1	15.48	1	0	7.1	1	28	NA
Cent	1	13.95	0	1	8.5	1	38	NA
Cent	1	11.94	0	0	5.7	0	66	16.7
Cent	1	18.61	1	2	5.8	0	42	17.1
Cent	1	18.4	1	0	5.7	0	44	NA
Cent	1	12.53	1	2	5.7	0	50	22.1
Cent	1	23.32	0	1	6.4	0	48	15.1
Cent	1	11.29	0	1	5.6	0	32	18.7
Cent	1	21.53	1	1	5.1	0	36	NA
Cent	1	41.45	0	2	5.7	0	35	NA
Cent	1	11.3	1	1	5.6	0	74	NA
Cent	1	18.62	0	1	5.5	0	48	NA
Cent	0	16.05	1	1	6	0	52	14.1
Cent	1	2.59	2	0	7.8	1	31	NA
Cent	1	10.91	0	1	5.7	0	52	14.3
Cent	1	66.08	0	1	4.9	0	62	22.4
Cent	1	15.66	1	0	5.9	0	44	20.5
Cent	1	44.52	1	0	5.1	0	52	NA
Cent	1	34.67	1	1	5.7	0	68	NA
Cent	1	12.91	1	0	4.8	0	18	19.2
Cent	1	14.13	2	1	5.9	0	35	17.8
Cent	1	14.24	1	0	5.3	0	45	NA
Cent	1	21.94	1	2	5.3	0	46	NA
Cent	1	17.13	0	0	5.2	0	32	NA
Cent	1	14.18	1	1	5.6	0	42	24.2
Cent	1	13.36	0	1	6.4	0	62	21.4
Cent	1	11.95	1	1	5.8	0	35	21.4
Cent	1	16.5	0	0	5.5	0	32	19
Cent	0	10.57	2	0	5.6	0	36	20.6
VeryOld	0	16.359	0	1	6.1	0	93	20.5
VeryOld	1	18.164	0	2	5.5	0	98	20.5
VeryOld	0	17.456	0	0	5.9	0	46	24.1
VeryOld	1	17.283	0	1	5.8	0	54	19.9
VeryOld	1	7.871	0	1	5.8	0	60	19.5
VeryOld	0	5.847	0	1	5.6	0	86	16
VeryOld	0	6.627	1	1	5.7	0	43	24.6
VeryOld	1	12.905	0	1	5.7	0	64	23.2
VeryOld	1	9.005	0	1	6.4	0	52	20.6
VeryOld	0	4.638	1	1	5.5	0	50	26.4
VeryOld	1	20.662	1	1	5.8	0	79	22.2
VeryOld	0	3.156	2	1	5.6	0	57	21.6
VeryOld	1	5.395	1	1	5.7	0	52	24.1
VeryOld	1	3.885	1	1	6.3	0	53	19.4
VeryOld	1	5.698	1	2	6.7	1	65	24.9
VeryOld	1	19.016	0	1	5.7	0	66	15.7
VeryOld	1	21.425	1	0	5.8	0	70	23.7
VeryOld	1	6.473	0	1	5.3	0	56	19.7
VeryOld	0	3.501	2	1	6	0	62	21.3
VeryOld	1	19.83	1	2	5.5	0	48	20.6
VeryOld	0	9.655	1	0	5.3	0	60	21.5
VeryOld	1	3.227	2	2	5.6	0	65	19.9
VeryOld	0	5.615	0	1	7.8	1	55	29.8
VeryOld	0	12.169	0	1	5.6	0	47	21.1
VeryOld	1	9.345	1	0	6	0	55	24.2
VeryOld	1	7.53	1	1	4.8	0	68	19.7
VeryOld	1	5.016	1	1	5.6	0	67	23.9
VeryOld	0	16.709	0	1	5.5	0	78	17.2
VeryOld	1	6.071	1	0	6.8	1	55	20.6
VeryOld	0	10.398	1	0	5.2	0	49	22.3
VeryOld	0	8.976	1	1	5.5	0	61	18.8
VeryOld	1	10.878	1	0	6.7	1	56	21.2
VeryOld	1	21.048	1	1	5.6	0	69	16.7
VeryOld	0	4.319	0	1	5.7	0	52	22.8
VeryOld	0	10.546	0	1	6.3	0	38	18.2
VeryOld	1	9.709	0	1	7.4	1	50	22.7
VeryOld	1	7.491	1	1	5.7	0	75	22.4
VeryOld	0	3.689	1	2	6.3	1	61	32.3
VeryOld	0	4.177	0	2	5.6	0	40	26.6
VeryOld	0	3.823	0	0	6.1	0	40	22.4
VeryOld	0	5.668	0	2	5.4	0	65	22.6
VeryOld	0	5.963	0	2	6.2	0	49	20.9
VeryOld	0	13.193	0	1	5.7	0	52	17.2
VeryOld	0	2.923	1	0	5.4	0	77	21.2
VeryOld	0	10.861	0	1	5	0	54	19.4
VeryOld	0	14.655	0	1	5.4	0	59	23.6
VeryOld	1	35.858	0	0	5.9	0	70	18.7
VeryOld	0	12.306	0	0	5.6	0	50	22.4
VeryOld	0	3.823	0	0	10.3	1	46	22.1
VeryOld	1	7.824	1	0	5.3	0	64	17.6
VeryOld	1	13.488	1	0	5.3	0	58	16.6
VeryOld	1	6.855	1	1	6	0	56	24
VeryOld	0	4.456	0	1	7.2	1	42	21.5
VeryOld	1	11.52	2	1	5.5	0	72	18.6
VeryOld	1	6.739	1	0	6.9	1	40	21.7
VeryOld	0	2.979	2	0	5.3	0	59	20.4
VeryOld	1	8.251	1	1	5.5	0	50	22.4
VeryOld	0	9.289	0	2	6.4	1	47	21.9
VeryOld	0	12.055	0	1	5.5	0	79	17
VeryOld	1	4.425	1	1	5.7	0	55	20.4
VeryOld	0	15.595	0	1	5.2	0	56	18.8
VeryOld	1	18.726	0	0	5.7	0	64	17.3
VeryOld	1	9.72	0	1	5.6	0	64	20.6
VeryOld	0	3.036	1	1	5.9	0	63	23.4
VeryOld	0	9.603	1	0	5.9	0	65	20.8
VeryOld	1	14.457	0	1	5.6	0	65	17.8
VeryOld	1	2.746	2	2	5.5	0	61	20.6
VeryOld	1	1.016	0	1	5.3	0	49	28.2
VeryOld	0	6.42	2	1	5.6	0	37	20.7
VeryOld	1	4.765	1	1	5.5	0	49	24.2
VeryOld	0	4.044	1	0	5.3	0	37	21.4
VeryOld	1	9.856	1	0	5.5	0	75	17.5
VeryOld	0	14.251	0	0	6.2	0	66	20.6
VeryOld	0	5.604	0	1	6.5	1	50	18.6
VeryOld	0	9.332	1	0	5.6	0	65	NA
VeryOld	0	11.811	0	1	5.6	0	81	18.5
VeryOld	0	3.374	1	1	5.4	0	51	26.5
VeryOld	0	2.219	1	1	7.6	1	35	26
VeryOld	0	2.479	2	1	5.5	0	65	20.2
VeryOld	1	12.608	0	0	6.2	0	57	19.4
VeryOld	0	2.349	1	0	5.2	0	36	25.9
VeryOld	1	12.542	2	0	6.2	0	58	26.1
VeryOld	0	3.802	1	0	6.9	1	70	19.1
VeryOld	0	19.12	0	2	5.5	0	64	22
VeryOld	0	7.552	1	2	5.2	0	82	21.6
VeryOld	0	4.884	0	2	5.6	0	40	24.6
VeryOld	1	6.877	0	2	6	0	43	21.3
VeryOld	1	7.279	1	1	5.5	0	51	18.5
VeryOld	0	14.802	1	1	6.8	1	76	21.2
VeryOld	1	19.571	0	0	5.6	0	61	16.5
VeryOld	0	11.786	0	1	5.6	0	48	22.8
VeryOld	0	20.61	0	0	5.8	0	59	16.4
VeryOld	1	15.728	0	1	6.3	1	42	23.6
VeryOld	0	0.29	2	2	5.4	0	41	26.3
VeryOld	1	10.261	0	2	5.3	0	74	20.7
VeryOld	0	15.613	1	0	6.2	0	60	20.8
VeryOld	0	3.43	1	1	5.7	0	51	22.9
VeryOld	1	14.709	1	1	5.4	0	48	23.9
VeryOld	0	4.622	1	0	6.1	0	49	23.7
VeryOld	1	0.972	1	1	6.9	1	56	22.9
VeryOld	0	2.608	1	1	5.3	0	27	27
VeryOld	1	14.337	0	1	5.5	0	60	17.4
VeryOld	1	2.605	2	1	5.7	0	61	23.5
VeryOld	0	6.091	0	1	6.5	1	66	22
VeryOld	1	18.767	1	0	5.8	0	65	22.2
VeryOld	0	10.779	0	1	5.5	0	48	17.8
VeryOld	1	12.71	1	0	6	0	39	21.7
VeryOld	1	3.354	0	0	7.2	1	61	19.7
VeryOld	1	7.454	1	0	6	0	70	21.3
VeryOld	1	5.938	0	0	5.6	0	53	22.3
VeryOld	0	21.087	0	0	6.3	0	70	14.4
VeryOld	1	8.699	1	0	6	0	54	20.5
VeryOld	1	7.767	0	0	7.4	1	55	24.8
VeryOld	0	17.054	0	1	6.4	0	84	22.3
VeryOld	0	7.646	1	1	5.9	0	64	23.9
VeryOld	1	16.484	1	1	5.3	0	78	18.2
VeryOld	0	6.639	1	1	5.8	0	50	23.6
VeryOld	1	6.706	1	1	6	0	48	21.6
VeryOld	0	12.71	1	0	5.7	0	92	18.4
VeryOld	1	12.657	0	0	5.4	0	57	20.9
VeryOld	0	2.958	1	0	6.3	0	38	22.3
VeryOld	1	5.768	0	0	5.8	0	43	20.5
VeryOld	0	17.831	0	1	5.6	0	63	23.7
VeryOld	1	10.822	0	0	5.5	0	80	24.6
VeryOld	1	3.385	0	0	7.1	1	64	23.6
VeryOld	0	0.986	0	2	5.8	0	42	25.5
VeryOld	0	1.889	0	0	6.1	0	46	23.2
VeryOld	0	0.439	1	1	5.6	0	42	24
VeryOld	1	18.67	0	1	5.8	0	82	25.6
VeryOld	0	15.02	0	0	5.8	0	54	20.8
VeryOld	0	4.414	1	0	5.8	0	50	23.3
VeryOld	1	4.16	1	0	6.1	0	55	21.4
VeryOld	0	6.322	2	0	6.1	0	64	17.7
VeryOld	0	3.717	1	0	5.9	0	61	24
VeryOld	1	39.123	0	0	5.6	0	69	14.4
VeryOld	1	8.519	0	0	5.8	0	57	21.7
VeryOld	0	15.065	1	1	6.9	1	58	19.6
VeryOld	0	3.226	0	1	5.9	0	41	24
VeryOld	1	6.29	1	2	5.8	0	51	19
VeryOld	0	8.382	1	0	5.7	0	47	17.6
VeryOld	0	17.18	0	0	6.2	0	40	23.4
VeryOld	0	4.313	1	1	5.8	0	68	19
VeryOld	1	9.061	1	1	5.9	0	62	22.9
VeryOld	1	19.627	1	0	6.5	1	79	15.6
VeryOld	0	6.903	0	0	6.1	0	44	21.7
VeryOld	1	9.005	1	2	5.5	0	76	20.3
VeryOld	1	3.449	0	1	6	0	32	25.5
VeryOld	0	4.362	2	1	6.2	1	34	25.5
VeryOld	1	23.74	1	2	6	0	71	17.1
VeryOld	0	4.016	1	1	6.2	0	57	19.8
VeryOld	0	7.532	1	1	6.1	0	69	18.2
VeryOld	0	9.751	0	1	5.4	0	40	15.3
VeryOld	1	8.423	1	1	5.5	0	59	24.4
VeryOld	1	12.334	1	0	5.8	0	52	17
VeryOld	1	10.177	0	2	5.7	0	53	24.2
VeryOld	1	14.077	1	0	5.3	0	72	17
VeryOld	0	7.35	1	2	5.9	0	58	20.8
VeryOld	1	12.572	0	0	6.4	0	70	23.6
VeryOld	0	6.123	0	1	6.4	0	34	26.7
VeryOld	1	6.999	1	1	5.6	0	57	23.4
VeryOld	1	12.126	0	1	5.9	0	68	21.6
VeryOld	0	11.594	0	0	5.7	0	46	20.3
VeryOld	0	10.346	0	1	6	0	40	21.1
VeryOld	0	2.44	0	0	6.6	1	49	25.7
VeryOld	0	15.118	0	1	5.6	0	70	22.8
VeryOld	0	16.451	1	0	6.4	0	74	16.2
VeryOld	1	19.695	1	1	5.2	0	70	18.6
VeryOld	0	20.007	0	0	7.9	1	63	22.3
VeryOld	1	8.555	0	1	5.9	0	46	26.3
VeryOld	1	12.186	0	2	6.7	1	61	26.2
VeryOld	0	7.756	1	0	6.1	0	44	20.7
VeryOld	1	7.586	1	1	5.7	0	62	23.7
VeryOld	0	14.378	0	0	5.8	0	61	20.3
VeryOld	1	6.79	1	0	6.4	0	51	26.7
VeryOld	1	15.03	0	1	5.4	0	84	20.8
VeryOld	1	18.124	1	1	5.7	0	57	26.5
VeryOld	1	10.341	0	1	5.1	0	40	16.7
VeryOld	1	6.205	0	1	6.1	0	45	20.9
VeryOld	0	6.921	0	1	5.9	0	60	19.6
VeryOld	1	9.888	0	1	8.2	1	64	16.6
VeryOld	1	5.864	1	0	7.5	1	80	25.2
VeryOld	1	7.179	0	1	6.6	1	34	23.8
VeryOld	0	7.046	1	1	5.9	0	51	18
VeryOld	1	15.774	0	1	6	0	54	21.4
VeryOld	1	22.41	1	2	5.8	0	76	19.9
VeryOld	0	19.813	1	0	5.8	0	65	19.2
VeryOld	1	21.071	2	0	5.9	0	99	17
VeryOld	1	5.78	1	0	5.9	0	56	26.4
VeryOld	1	4.006	1	2	7.4	1	48	25
VeryOld	1	12.644	1	1	7.5	1	35	22.4
VeryOld	1	16.058	0	0	5.7	0	67	16.4
VeryOld	1	1.529	1	0	6.8	1	28	22.9
VeryOld	0	4.457	1	2	5.8	0	70	26
VeryOld	1	9.611	1	0	5.9	0	53	27.3
VeryOld	1	10.997	1	1	5.3	0	67	20.1
VeryOld	0	8.685	1	1	5.5	0	89	19.8
VeryOld	0	15.805	1	1	5.4	0	66	23.4
VeryOld	0	1.324	1	0	7.5	1	49	22.5
VeryOld	0	11.602	0	0	5.9	0	62	18.1
VeryOld	1	9.838	0	1	6.8	1	81	17.9
VeryOld	0	4.882	1	0	5.5	0	45	21.8
VeryOld	1	3.869	0	1	5.6	0	53	15.5
VeryOld	1	18.46	0	1	6.4	0	60	21.5
VeryOld	0	9.39	0	0	5.2	0	44	20.8
VeryOld	0	9.861	1	0	6	0	48	17.5
VeryOld	0	12.706	0	0	5.4	0	73	17.3
VeryOld	1	4.046	1	1	5.9	0	46	29.6
VeryOld	1	31.557	0	1	5.7	0	91	19.5
VeryOld	1	16.743	0	2	5.3	0	67	23.1
VeryOld	0	5.147	1	0	6.6	1	55	20.8
VeryOld	1	20.182	0	0	5.6	0	74	18.8
VeryOld	0	16.045	0	2	5.2	0	36	20.2
VeryOld	0	18.271	0	1	6	0	80	28
VeryOld	1	31.692	0	0	5.8	0	91	31.5
VeryOld	1	16.426	0	1	5.5	0	58	15.5
VeryOld	1	26.054	0	2	5.9	0	82	19.6
VeryOld	1	12.392	1	1	5.9	0	65	23.1
VeryOld	1	13.477	2	0	4.9	0	75	15.6
VeryOld	1	4.221	0	0	5.8	0	45	23.8
VeryOld	1	3.227	0	1	6	0	58	22.5
VeryOld	1	14.994	0	0	5.4	0	51	23.2
VeryOld	0	3.811	0	1	6.2	0	42	26.7
VeryOld	1	20.633	0	1	5.9	0	77	23.1
VeryOld	0	47.55	1	1	7.2	1	91	18.1
VeryOld	1	42.823	0	0	5.1	0	88	18.9
VeryOld	1	11.821	0	1	5.4	0	57	19.9
VeryOld	1	14.403	1	1	5.7	0	66	23.3
VeryOld	1	4.86	1	0	6.1	0	61	20.8
VeryOld	1	12.011	0	0	6.2	0	71	22.8
VeryOld	1	9.961	2	1	5.8	0	74	17.4
VeryOld	0	5.348	0	2	5.8	0	46	21.7
VeryOld	1	10.948	1	1	6.1	0	70	23.8
VeryOld	0	11.808	0	0	7.5	1	58	24.7
VeryOld	1	37.014	0	0	5.6	0	107	19.2
VeryOld	1	20.009	0	0	5.9	0	98	19.7
VeryOld	1	4.139	0	0	6	1	48	21.7
VeryOld	1	4.624	1	2	6.1	0	58	27.6
VeryOld	1	6.186	1	1	6.4	1	64	23.9
VeryOld	0	13.623	0	1	5.3	0	53	21.7
VeryOld	1	2.806	1	0	10.1	1	52	20.8
VeryOld	0	10.053	0	1	5.8	0	31	23.1
VeryOld	1	14.201	0	1	5.8	0	69	22.8
VeryOld	0	17.657	0	1	5.7	0	37	19.8
VeryOld	0	18.401	1	1	7.2	1	71	19.1
VeryOld	1	17.664	0	2	6	0	68	22.3
VeryOld	0	21.958	0	0	5.9	0	63	14.7
VeryOld	1	4.09	1	1	5.8	0	55	21.9
VeryOld	0	7.385	1	0	7.5	1	65	22.9
VeryOld	1	36.089	1	1	5.9	0	83	19
VeryOld	1	21.215	0	1	6.1	0	63	17.4
VeryOld	1	21.39	2	1	5.6	0	83	17
VeryOld	1	26.094	1	1	5.3	0	69	21.4
VeryOld	1	13.681	0	1	5.9	0	91	23.5
VeryOld	0	6.816	0	2	5.5	0	48	20.7
VeryOld	0	4.714	1	0	5.8	0	51	19.7
VeryOld	0	14.802	0	1	5.6	0	67	18
VeryOld	1	21.663	1	0	5.4	0	64	18.8
VeryOld	0	4.505	1	2	5.4	0	81	22.1
VeryOld	1	8.039	2	0	6	0	51	25.1
VeryOld	1	10.768	0	2	6.5	1	59	17.6
VeryOld	1	16.33	1	1	5.5	0	66	17.2
VeryOld	1	21.016	1	1	5.5	0	69	21.8
VeryOld	0	4.091	1	1	7.5	1	64	23.8
VeryOld	0	3.892	1	2	6.6	1	45	25.2
VeryOld	0	8.363	0	1	5.7	0	75	19.6
VeryOld	0	24.479	0	2	6.3	1	70	21.9
VeryOld	1	4.563	1	2	5.8	0	47	23.5
VeryOld	0	22.126	1	2	5.9	0	63	18.2
VeryOld	1	15.786	0	1	5.5	0	34	21
VeryOld	1	7.071	2	1	5.9	0	72	20.6
VeryOld	1	8.337	1	0	5.5	0	47	24.7
VeryOld	1	12.677	1	0	5.9	0	81	18.5
VeryOld	1	16.949	1	1	6.1	1	82	24.1
VeryOld	0	6.897	1	1	6	0	43	22.3
VeryOld	0	4.281	0	1	8.6	1	52	24.3
VeryOld	1	18.54	1	2	5.4	0	54	22.8
VeryOld	1	13.973	1	2	5	0	61	21.4
VeryOld	0	10.896	1	0	5.1	0	42	NA
VeryOld	1	21.379	0	2	5.6	0	62	23.6
VeryOld	0	26.791	0	0	5.8	0	67	19.5
VeryOld	1	14.736	0	0	5.7	0	65	23.4
VeryOld	0	18.131	0	1	5.2	0	50	25.4
VeryOld	0	13.551	1	2	5.5	0	42	30.9
VeryOld	1	28.233	1	1	5.6	0	70	19.6
VeryOld	0	10.102	1	2	5.1	0	47	21.3
VeryOld	1	12.227	2	2	5.7	0	72	23.2
VeryOld	0	8.229	1	0	5.8	0	49	23.4
VeryOld	1	20.362	0	1	6.5	1	63	14.5
VeryOld	0	18.443	1	1	5.8	0	80	17.1
VeryOld	0	6.781	0	0	7.9	1	54	22.2
VeryOld	1	31.251	1	1	5.4	0	62	13.1
VeryOld	1	23.23	0	1	5.5	0	91	23
VeryOld	0	5.052	1	1	5.7	0	41	25.6
VeryOld	1	4.1	1	0	6.6	1	50	24.5
VeryOld	0	3.121	2	1	5.2	0	56	21.9
VeryOld	1	21.406	0	0	6.2	0	68	21.7
VeryOld	0	9.187	0	1	5.3	0	43	24
VeryOld	0	9.103	0	0	7.3	1	48	21.8
VeryOld	1	7.905	0	1	6.1	0	42	26.5
VeryOld	1	6.778	1	0	5.7	0	47	25.6
VeryOld	1	8.312	0	1	6.8	1	45	28.6
VeryOld	0	17.622	1	1	5.7	0	70	22.7
VeryOld	1	17.589	0	1	5.8	0	55	18.9
VeryOld	1	7.364	1	0	5.4	0	38	25.7
VeryOld	0	17.157	0	1	5.8	0	59	19
VeryOld	1	22.457	0	1	5.6	0	70	17.8
VeryOld	0	18.098	0	1	5.3	0	55	19.7
VeryOld	1	12.892	0	1	5.3	0	81	24.7
VeryOld	0	4.667	0	1	5.4	0	48	22.2
VeryOld	0	2.146	1	1	5.2	0	69	20.6
VeryOld	1	15.178	1	1	5.7	0	67	20.3
VeryOld	1	20.496	0	1	5.6	0	69	19.6
VeryOld	0	10.126	0	1	5.5	0	63	19.6
VeryOld	0	10.928	0	0	5.5	0	58	21.8
VeryOld	1	16.403	1	1	5.4	0	80	25.4
VeryOld	1	7.958	1	0	5.9	0	88	18.2
VeryOld	1	22.325	0	0	5.3	0	74	29.7
VeryOld	1	22.36	0	0	5.8	0	61	23.8
VeryOld	0	7.801	0	1	5.6	0	39	21.9
VeryOld	1	4.477	1	0	6.2	0	52	22.5
VeryOld	1	9.496	1	1	5.5	0	53	22.3
VeryOld	0	11.893	1	1	6.3	0	46	23.3
VeryOld	0	5.63	0	0	6.1	0	38	21.8
VeryOld	0	6.848	0	0	NA	0	70	24.3
VeryOld	0	2.157	1	0	7.1	1	35	23.1
VeryOld	1	23.626	1	0	5.5	0	69	16.3
VeryOld	1	6.244	2	0	5.1	0	53	25.3
VeryOld	0	17.947	0	2	5.6	0	57	19
VeryOld	1	14.452	0	1	5.6	0	57	27.6
VeryOld	1	4.744	1	0	5.6	0	63	26.4
VeryOld	1	3.739	1	0	6.8	1	60	19.3
VeryOld	1	4.988	0	1	5.8	0	45	25.1
VeryOld	0	39.105	0	1	5.5	0	87	21.1
VeryOld	0	9.533	1	0	5.8	0	54	18.9
VeryOld	1	27.319	0	1	5.5	0	71	16.6
VeryOld	1	23.594	0	0	5.4	0	76	14.3
VeryOld	1	21.305	0	0	5.5	0	60	26.3
VeryOld	1	14.078	0	1	5.9	0	59	19.9
VeryOld	0	2.038	1	0	6.3	0	35	25.9
VeryOld	1	5.897	1	1	6.5	1	67	16.8
VeryOld	0	14.951	0	0	5.9	0	61	21.1
VeryOld	0	7.697	1	0	8.8	1	45	24.6
VeryOld	1	3.383	0	0	5.6	0	34	23.8
VeryOld	1	12.063	0	0	5.6	1	60	16.2
VeryOld	1	9.073	1	1	5.1	0	50	17.6
VeryOld	1	3.881	0	1	6.7	1	29	26.4
VeryOld	1	18.591	0	1	5.5	0	86	20.3
VeryOld	1	5.128	1	1	5.9	0	65	24.2
VeryOld	1	21.198	1	1	5.7	0	68	19.5
VeryOld	1	5.96	1	0	5.8	0	73	23.8
VeryOld	0	2.579	1	1	6	0	44	24
VeryOld	1	9.707	0	0	6.1	0	54	19.2
VeryOld	1	7.091	1	1	5.7	0	47	22
VeryOld	1	21.876	0	0	5.8	0	73	18.3
VeryOld	1	4.648	0	1	5.9	0	55	26.2
VeryOld	0	4.106	1	1	5.4	0	47	29
VeryOld	1	12.957	2	0	5.9	0	89	17.7
VeryOld	0	7.615	1	1	5.7	0	43	28.4
VeryOld	0	2.773	2	0	6.6	1	66	24.4
VeryOld	0	13.66	0	2	5.4	0	71	24.6
VeryOld	1	23.808	0	2	5.5	0	59	21.1
VeryOld	1	13.304	0	0	5.5	0	113	20.5
VeryOld	0	2.035	2	1	5.8	0	52	21.7
VeryOld	0	13.198	1	1	6.2	0	47	20.9
VeryOld	0	4.319	1	0	5.5	0	48	22.3
VeryOld	0	6.619	1	1	6.5	1	55	23.2
VeryOld	1	25.112	1	1	5.3	0	54	16.2
VeryOld	1	17.037	0	0	5.8	0	64	16
VeryOld	1	31.955	2	2	5.4	0	60	19.2
VeryOld	1	10.177	1	1	6	0	87	22.5
VeryOld	1	8.417	2	1	5.5	0	67	17.3
VeryOld	1	11.261	1	1	6	0	57	23.8
VeryOld	1	10.672	0	2	5.7	0	40	20.4
VeryOld	0	4.457	1	0	5.4	0	69	18
VeryOld	1	10.751	1	0	6.2	0	56	18
VeryOld	0	15.205	1	0	5.7	0	53	26
VeryOld	1	4.998	1	0	5	0	36	19.9
VeryOld	1	6.78	1	1	5.5	0	52	23.5
VeryOld	0	11.125	1	1	6.4	1	41	22.1
VeryOld	0	3.081	1	1	5.7	0	65	21.3
VeryOld	0	3.036	0	0	5.7	0	56	25.6
VeryOld	1	4.314	1	1	6.1	0	35	15.8
VeryOld	1	10.653	1	0	5.3	0	62	21.9
VeryOld	0	4.164	0	1	6.9	1	51	28.3
VeryOld	0	9.02	1	1	5.4	0	70	20.3
VeryOld	1	6.534	2	1	5.2	0	51	17.8
VeryOld	0	7.221	0	0	6	0	48	30.4
VeryOld	1	5.418	0	0	5.5	0	32	24.6
VeryOld	0	1.05	1	1	6.8	1	47	20.1
VeryOld	1	8.025	0	1	5.6	0	74	23.9
VeryOld	1	4.966	1	1	6.1	0	62	22.1
VeryOld	0	7.271	0	0	6.5	1	49	20.8
VeryOld	0	4.012	1	1	6.4	0	61	22.5
VeryOld	0	7.316	1	0	6	0	34	22.4
VeryOld	0	9.278	1	1	5.6	0	52	21.4
VeryOld	1	6.588	0	1	8.1	1	47	20
VeryOld	0	6.047	0	1	5.6	0	29	27.7
VeryOld	0	12.531	0	1	6.2	0	73	20.3
VeryOld	1	16.076	0	1	6.4	0	60	16.9
VeryOld	1	18.319	1	2	5.1	0	75	19.8
VeryOld	0	11.956	0	1	5.4	0	64	19.4
VeryOld	1	27.939	1	1	5.5	0	62	17.1
VeryOld	1	3.182	1	1	7.1	1	50	25.4
VeryOld	1	8.857	0	0	5.6	0	72	21
VeryOld	0	12.711	1	1	5.4	0	69	19.7
VeryOld	1	10.26	0	0	7.2	1	48	21.5
VeryOld	1	20.679	0	1	5.5	0	75	20
VeryOld	0	50.158	1	0	7.4	1	63	23.3
VeryOld	0	10.886	1	1	6.2	0	48	14.8
VeryOld	0	1.224	2	2	7.1	1	42	22.8
VeryOld	0	10.317	1	1	5.6	0	66	18.1
VeryOld	1	13.976	0	1	5.8	0	43	21
VeryOld	0	11.695	0	0	5.9	0	64	17.2
VeryOld	1	6.115	2	0	5.2	0	60	18
VeryOld	0	4.763	1	1	6.4	0	44	25.1
VeryOld	1	10.281	0	1	5.7	0	56	22.5
VeryOld	0	16.068	0	0	5.2	0	67	17
VeryOld	0	2.371	0	0	6.1	0	41	23.6
VeryOld	1	8.764	0	1	5.8	0	104	18.5
VeryOld	1	10.346	0	0	5.9	0	62	24.7
VeryOld	0	11.9	0	1	5.4	0	51	19.7
VeryOld	1	16.656	0	2	5.6	0	62	18.1
VeryOld	1	12.91	0	0	6	0	55	18
VeryOld	1	18.322	0	0	5.1	0	92	17.1
VeryOld	1	8.799	1	0	5.5	0	72	20.4
VeryOld	1	3.378	1	0	6.9	1	49	20.2
VeryOld	1	13.124	1	1	5.7	0	45	19.2
VeryOld	0	6.772	0	0	6.1	0	50	25.2
VeryOld	1	7.139	1	1	7.1	1	69	30
VeryOld	1	16.198	0	2	5.5	0	67	25.4
VeryOld	1	5.314	0	0	5.9	0	27	20.6
VeryOld	1	10.064	0	0	5.5	0	50	21.9
VeryOld	0	18.6	0	2	6.2	0	57	13.9
VeryOld	1	21.08	1	2	5.9	0	65	24.1
VeryOld	1	10.961	1	1	6.5	1	59	21.7
VeryOld	0	15.572	0	2	5.8	0	39	26.3
VeryOld	0	7.467	0	0	6.2	0	48	26.1
VeryOld	0	5.557	0	0	6.2	0	45	20.8
VeryOld	1	9.104	2	2	5.6	0	64	22
VeryOld	1	5.285	1	2	5.6	0	55	23
VeryOld	1	14.991	0	1	6.1	0	50	29.1
VeryOld	0	5.6	0	1	5.9	0	42	21.9
VeryOld	1	18.633	1	0	5.8	0	83	22.1
VeryOld	1	31.842	1	2	5.1	0	72	19.3
VeryOld	1	13.377	0	0	5.5	0	50	19
VeryOld	0	5.742	1	1	5.5	0	25	18.7
VeryOld	1	4.984	1	0	5.9	0	57	26.3
VeryOld	1	21.654	1	0	5.6	0	79	20.9
VeryOld	1	11.889	0	0	6.4	0	47	20.5
VeryOld	1	18.145	0	0	5.9	0	52	20
VeryOld	0	6.205	0	0	5.7	0	56	22.6
VeryOld	0	17.59	0	1	5.7	0	65	20.7
VeryOld	0	19.582	1	1	5.6	0	63	20.8
VeryOld	1	9.803	1	1	9.6	1	61	21
VeryOld	1	16.935	0	0	5.4	0	78	17.9
VeryOld	1	18.424	0	0	5.4	0	66	21.4
VeryOld	0	18.854	0	1	5.4	0	53	17.7
VeryOld	1	10.282	2	2	5.9	0	78	25.7
VeryOld	1	45.448	2	1	5.2	0	100	19.4
VeryOld	1	9.218	0	1	6.1	0	40	22.2
VeryOld	1	12.427	0	2	5.6	0	63	19.8
VeryOld	1	4.256	1	0	5.6	0	38	18.7
VeryOld	1	17.98	1	1	5.2	0	69	22.7
VeryOld	0	7.319	0	0	5.8	0	46	22.4
VeryOld	0	2.773	0	0	6.2	0	37	21.6
VeryOld	1	9.403	2	0	5.5	0	61	26.6
VeryOld	0	6.738	0	1	5.7	0	43	19
VeryOld	1	15.005	0	1	5.7	0	68	21.4
VeryOld	0	18.374	1	1	5.4	0	66	22.4
VeryOld	1	17.582	1	1	6.4	0	74	21.9
VeryOld	0	4.725	0	0	6	0	43	22.7
VeryOld	0	8.203	1	0	5.8	0	63	19.5
VeryOld	1	11.986	1	0	5.8	0	55	20.8
VeryOld	1	22.812	0	1	5.5	0	36	19.4
VeryOld	0	20.841	1	2	4.7	0	36	20.2
VeryOld	1	30.003	0	2	5.4	0	50	20.5
VeryOld	1	3.826	2	0	6.3	0	49	26.7
VeryOld	0	5.96	2	1	6.3	0	39	19.2
VeryOld	0	4.221	0	1	5.9	0	53	22.6
VeryOld	0	10.28	0	2	6.7	1	38	25.59
VeryOld	1	6.08	1	0	7.5	1	63	23.04
VeryOld	1	11.95	0	1	5.7	0	78	22.07
VeryOld	1	29.88	0	1	5.5	0	99	17.76
VeryOld	0	17.14	0	0	5.4	0	49	17.51
VeryOld	0	5.2	1	0	5.5	0	56	27.27
VeryOld	0	6.1	2	1	6.2	0	52	23.3
VeryOld	0	3.66	0	0	9.1	1	32	23.13
VeryOld	1	5.59	0	1	5.5	0	51	23.74
VeryOld	1	10.9	0	0	6.2	1	45	26.2
VeryOld	0	10.94	1	1	5.7	0	69	22.79
VeryOld	0	19.84	1	0	6.2	0	79	22.03
VeryOld	0	23.96	0	0	6	0	38	20.7
VeryOld	1	26.94	2	0	5.5	0	83	23.72
VeryOld	1	9.04	0	1	5.7	0	106	27.39
VeryOld	1	3.39	1	0	5.7	0	49	24.62
VeryOld	1	22.08	0	0	6.2	0	74	22.95
VeryOld	1	17.56	1	1	5.8	0	62	23.81
VeryOld	0	11.08	0	0	5.7	0	77	22.43
VeryOld	0	9.99	1	1	5.5	0	45	22.01
VeryOld	0	10.67	0	0	6.1	0	52	24.57
VeryOld	1	26.56	0	0	5.5	0	77	20.5
VeryOld	1	10.42	1	0	6.3	0	44	26.4
VeryOld	1	21.32	2	0	5.9	0	82	20.09
VeryOld	0	11.67	1	1	7.1	1	30	27.82
VeryOld	0	3.01	1	1	5.4	0	57	26.19
VeryOld	0	5.13	1	1	5.9	0	39	26.1
VeryOld	0	3.47	1	1	5.3	0	80	23.87
VeryOld	0	8.95	0	1	5.7	0	68	22.04
VeryOld	0	5.72	0	0	5.8	0	49	22.65
VeryOld	0	8.5	0	1	7.3	1	45	24.73
VeryOld	1	3.71	1	1	6.2	0	45	24.81
VeryOld	0	14.9	0	1	6.1	0	63	20.12
VeryOld	0	6.29	2	0	5.5	0	73	20.68
VeryOld	1	2.58	1	2	6	0	66	27.47
VeryOld	0	9.26	0	2	5.3	0	46	24.74
VeryOld	0	3.33	1	1	6.9	1	41	28.81
VeryOld	0	3.48	2	0	5.6	0	55	23.69
VeryOld	1	6.65	1	0	5.4	0	61	22.88
VeryOld	0	18.95	2	1	5.6	0	54	24.39
VeryOld	1	8.3	1	1	5.8	0	48	24.77
VeryOld	0	5.55	1	1	6	0	56	20.42
VeryOld	0	12.1	1	1	5.6	0	47	24.2
VeryOld	0	30.29	0	0	6.3	1	58	26.64
VeryOld	1	6.72	2	0	5.2	0	85	22.13
VeryOld	0	14.05	1	1	7.3	1	52	22.16
VeryOld	0	1.99	1	0	6.7	1	42	24.64
VeryOld	0	16.57	0	1	5.8	0	74	22.25
VeryOld	0	11.33	1	0	6.5	1	56	20.09
VeryOld	1	19.21	0	0	5.8	0	66	19.99
VeryOld	0	10.99	0	1	6.6	1	69	20.18
VeryOld	0	9.62	0	1	5.3	0	43	20.14
VeryOld	1	9.37	0	2	6	0	68	18.7
VeryOld	0	7.05	1	1	5.7	0	42	30.32
VeryOld	0	1.88	2	1	5.7	0	51	24.78
VeryOld	1	7.69	0	1	7.4	1	54	26.06
VeryOld	1	16.57	0	0	5.4	0	97	19.88
VeryOld	0	4	1	1	5.8	0	52	19.25
VeryOld	0	4.27	0	0	6	0	45	25.44
VeryOld	1	4.56	1	1	6.3	0	44	24.77
VeryOld	1	42.38	0	0	7.4	1	60	24.07
VeryOld	0	1.37	1	1	6.5	1	33	28.13
VeryOld	0	9.52	0	0	5.4	0	42	20.9
VeryOld	1	9.85	0	1	5.8	0	65	22.52
VeryOld	1	10.06	1	0	5.6	0	59	24.01
VeryOld	1	23.54	0	0	5.5	0	96	20.67
VeryOld	0	22.43	1	1	6.6	1	82	23.08
VeryOld	0	4.84	1	0	6	0	55	22.6
VeryOld	0	3.03	1	0	7.5	1	56	27.38
VeryOld	1	4.12	1	0	6.8	1	42	25.06
VeryOld	0	13.34	0	0	5.8	0	92	22.27
VeryOld	0	9.08	1	0	5.9	0	61	23.28
VeryOld	1	23.66	1	0	5.6	0	72	20.87
VeryOld	1	8.74	2	0	5.8	0	61	24.33
VeryOld	1	4.88	0	1	5.6	0	78	28.67
VeryOld	1	21.61	0	1	5.7	0	83	19.01
VeryOld	0	10.8	1	0	5.8	0	84	23.6
VeryOld	0	1.56	1	1	6.1	0	43	26.14
VeryOld	1	6.14	0	1	7.1	1	62	27.28
VeryOld	0	5.51	0	0	5.8	0	46	23.14
VeryOld	1	11.07	0	0	5.8	0	77	22.85
VeryOld	0	6.22	0	0	5.5	0	57	24.71
VeryOld	1	7.35	2	2	5.6	0	79	27.83
VeryOld	1	3.74	0	2	7.4	1	71	20.7
VeryOld	0	8.85	1	1	7	1	48	25.55
VeryOld	0	11.72	1	0	5.7	0	76	21.86
VeryOld	1	12.73	1	1	5.2	0	64	24.18
VeryOld	1	15.41	0	1	5.7	0	69	22.59
VeryOld	1	3.22	1	0	5.7	0	38	23.74
VeryOld	1	2.59	2	0	5.9	0	48	21.64
VeryOld	0	6.01	1	1	6.7	1	62	20.89
VeryOld	0	7.82	0	0	6.4	1	39	25.08
VeryOld	1	9.75	0	1	5.8	0	62	20.76
VeryOld	1	11.36	1	1	5.4	0	70	21.26
VeryOld	0	7.88	0	1	5.7	0	72	22.77
VeryOld	0	10.25	0	0	5.3	0	86	23.3
VeryOld	0	5.97	1	0	5.3	0	64	23.46
VeryOld	0	2.02	1	0	5.7	0	59	23.11
VeryOld	1	19.09	0	1	5.2	0	71	21.52
VeryOld	0	3.05	0	1	5.3	0	69	21.55
VeryOld	0	7.21	1	0	5.5	0	66	24.88
VeryOld	1	5.36	2	0	6.4	0	72	23.64
VeryOld	0	2.3	2	1	5.9	0	50	22.39
VeryOld	0	7.75	0	0	6.2	0	55	25.05
VeryOld	1	17.14	1	0	5.8	0	86	19.35
VeryOld	1	8.15	1	0	6.7	1	78	21.26
VeryOld	1	4.58	1	0	6.2	1	39	27.79
VeryOld	0	4.88	1	1	5.5	0	39	26.15
VeryOld	0	2.44	1	0	5.9	0	52	25.82
VeryOld	0	1.63	2	1	6.3	0	39	24.82
VeryOld	1	11.26	1	1	6.5	1	74	25.51
VeryOld	0	7.69	0	0	6.1	0	66	19.29
VeryOld	1	3.39	1	1	5.9	0	49	23.23
VeryOld	1	3.37	0	0	5.2	0	37	23.68
VeryOld	0	5.3	1	1	5.8	0	38	22.49
VeryOld	0	3.93	0	0	5.5	0	49	23.06
VeryOld	0	6.72	0	1	6.2	0	40	24.26
VeryOld	0	4.9	0	1	5.6	0	42	22.58
VeryOld	0	2.74	1	1	6.5	1	36	21.33
VeryOld	1	9.33	1	0	5.9	0	60	24.03
VeryOld	1	17.93	1	0	5.6	0	73	20.09
VeryOld	1	17.22	1	0	5.8	0	57	14.13
VeryOld	1	16.11	0	1	5.6	0	51	20.14
VeryOld	1	17.76	1	0	6	0	80	18.57
VeryOld	1	6.24	1	1	5.4	0	61	21.99
VeryOld	0	3.07	1	0	5.9	0	45	22.78
VeryOld	1	4.31	1	0	5.6	0	52	24.21
VeryOld	0	7.86	1	0	5.6	0	55	21.97
VeryOld	1	28.89	0	1	5.5	0	75	27.27
VeryOld	1	5.49	1	0	5.5	0	75	19.69
VeryOld	0	6.58	0	0	5.6	0	41	25.05
VeryOld	1	6.66	2	1	5.8	0	42	19.52
VeryOld	1	5.26	1	1	5.7	0	59	25.47
VeryOld	1	8.21	1	1	6.2	0	65	23.61
VeryOld	1	3.03	1	0	5.8	0	47	22.38
VeryOld	1	9.12	0	0	5.8	0	47	22.65
VeryOld	1	10.94	1	0	6	0	60	30.51
VeryOld	0	6.43	0	0	6.1	0	61	22.33
VeryOld	0	4.23	0	1	6.9	1	29	27.79
VeryOld	0	4.67	1	1	5.7	0	72	22.4
VeryOld	1	5.95	2	1	5.2	0	46	23.71
VeryOld	0	5.15	1	0	5.2	0	64	23.66
VeryOld	0	4.88	1	1	6	0	65	20.29
VeryOld	1	7.56	0	2	5.8	0	52	22.6
VeryOld	0	4.56	0	1	6.7	1	47	23.89
VeryOld	0	18.16	1	0	5.5	0	55	20.93
VeryOld	0	8.32	0	2	5.9	0	66	20.99
VeryOld	1	8.68	0	1	5.9	0	51	20.13
VeryOld	0	5.63	1	1	5.6	0	48	23.69
VeryOld	0	4.94	1	1	7.3	1	50	19.27
VeryOld	1	11.78	0	2	5.5	0	64	20.49
VeryOld	1	6.96	0	1	5.9	0	51	21.52
VeryOld	0	6.41	0	0	5.9	0	53	26.01
VeryOld	1	9.96	1	1	5.7	0	90	19.42
VeryOld	1	13.69	0	2	7.2	1	60	22.62
VeryOld	1	16.48	0	1	5.7	0	58	20.8
VeryOld	0	20.24	1	1	6.1	0	91	23.33
VeryOld	0	6.1	0	2	7.2	1	78	28.78
VeryOld	0	9.85	0	0	5.9	0	49	22.34
VeryOld	1	4.52	2	1	6.5	1	59	25.84
VeryOld	1	31.09	0	0	6.2	1	60	26.55
VeryOld	0	5.24	1	0	5.5	0	59	22.8
VeryOld	1	30.76	1	1	5.4	0	82	18.01
VeryOld	0	8.28	0	1	6.9	1	58	26.96
VeryOld	1	12.08	1	1	5.8	0	69	20.31
VeryOld	1	40.31	1	1	5.7	0	83	22.1
VeryOld	1	7.67	0	0	6.2	0	57	31.13
VeryOld	0	4.65	0	0	5.2	0	35	20.24
VeryOld	1	10.97	0	0	5	0	85	22.8
VeryOld	1	16.93	2	2	5.7	0	95	21.7
VeryOld	0	2.61	2	2	5.5	0	48	25.72
VeryOld	1	20.43	1	0	5.9	0	76	22.84
VeryOld	1	5.49	0	1	5.1	0	63	21.75
VeryOld	0	29.71	0	0	5.9	0	75	18.65
VeryOld	0	3.24	2	1	7.1	1	64	22.68
VeryOld	0	13.13	0	0	5.5	0	48	19.29
VeryOld	0	3.37	1	2	5.2	0	45	25.07
VeryOld	0	6.39	0	0	5.7	0	47	21.68
VeryOld	1	9.24	1	2	5.9	0	72	22.64
VeryOld	0	5.8	0	0	5.2	0	29	23.55
VeryOld	0	16.21	1	0	4.3	0	41	24.02
VeryOld	0	2.9	1	0	5.6	0	61	24.8
VeryOld	0	7.29	1	1	6.2	0	42	26.27
VeryOld	0	8.47	0	1	6	0	69	22.15
VeryOld	0	10.97	1	0	7.7	1	84	22.96
VeryOld	1	19.8	1	0	7.7	1	96	17.75
VeryOld	1	15.46	0	1	5.5	0	49	20.53
VeryOld	1	12.22	0	1	6.5	1	55	22.09
VeryOld	0	3.58	1	1	6.3	0	58	25.65
VeryOld	0	11.68	0	0	7	1	54	20.61
VeryOld	0	2.59	1	1	5.8	0	48	24.04
VeryOld	0	6.22	0	0	7.2	1	50	20.12
VeryOld	0	5.63	0	1	5.5	0	50	20.86
VeryOld	0	16.69	1	1	6	0	77	20.23
VeryOld	0	8.28	0	1	5.8	0	38	24.52
VeryOld	1	19.38	0	1	6.2	0	76	17.81
VeryOld	1	8.68	1	0	6.2	0	41	21.89
VeryOld	1	3.62	2	1	6	0	50	27.82
VeryOld	0	5.63	0	0	6.7	1	43	25.75
VeryOld	0	6.12	0	1	5.7	0	52	24.45
VeryOld	1	22.89	1	0	5.9	0	55	22.75
VeryOld	0	5.21	1	1	5.2	0	40	22.33
VeryOld	1	17.93	1	2	5.4	0	75	18.08
VeryOld	1	10.59	1	1	5.5	0	73	23.9
VeryOld	1	3.47	0	0	5.6	0	43	21.92
VeryOld	1	7.08	1	0	5.6	0	61	25.17
VeryOld	1	15.25	0	0	5.8	0	54	19.44
VeryOld	1	7	0	0	5.7	0	68	18.05
VeryOld	1	7.92	1	1	7.1	1	54	23.85
VeryOld	1	6.96	0	1	9.4	1	62	18.12
VeryOld	0	6.89	1	0	5.9	1	65	25.18
VeryOld	0	11.68	0	2	6.8	1	59	20.94
VeryOld	0	10.75	0	0	6.3	1	41	23.47
VeryOld	0	9.41	1	1	5.5	0	46	20.67
VeryOld	1	30.5	0	1	5.6	0	88	17.76
VeryOld	1	5.49	1	1	5.6	0	64	24.06
VeryOld	0	7.96	1	1	5.5	0	60	22.92
VeryOld	0	4.77	0	1	5.3	0	47	29.99
VeryOld	0	6.89	1	1	6.5	1	37	28.65
VeryOld	1	6.77	1	1	5.8	0	70	21.25
VeryOld	0	29.86	1	1	6	1	55	21.52
VeryOld	0	4.18	1	0	5.2	0	40	21.6
VeryOld	1	6.26	1	0	6.3	0	46	22.01
VeryOld	1	11.07	1	1	6.5	1	63	29.72
VeryOld	1	14.58	1	0	5.9	0	63	23.39
VeryOld	1	7.84	0	1	6.2	0	56	25.41
VeryOld	1	7.42	1	1	6.1	0	52	27.44
VeryOld	0	2.02	1	0	6.3	0	48	27.91
VeryOld	0	3.18	2	0	6.1	0	41	21.64
VeryOld	0	4.29	1	1	7.4	1	56	19.28
VeryOld	1	10.52	0	2	5.8	0	45	23.04
VeryOld	1	25.05	2	1	5.7	0	99	20.3
VeryOld	0	10.21	1	1	5.6	0	64	20.1
VeryOld	1	7.92	0	0	5.8	0	62	22.8
VeryOld	1	18.96	1	2	6	0	72	18.41
VeryOld	0	2.02	1	0	7.2	1	32	22.72
VeryOld	1	3.26	0	1	5.8	0	58	17.82
VeryOld	1	9.14	1	1	6	0	66	27.13
VeryOld	1	6.85	1	0	5.9	0	67	20.19
VeryOld	0	25.2	1	0	5.1	0	77	24.66
VeryOld	0	3.49	1	0	6	0	53	24.43
VeryOld	0	11.13	0	0	5.8	0	77	21.86
VeryOld	1	9.79	0	1	6.5	1	78	22.71
VeryOld	0	4.39	1	1	6	0	70	20.86
VeryOld	1	6.62	0	0	5.9	0	41	22.47
VeryOld	1	9.92	1	1	6	0	87	20.4
VeryOld	0	2.4	2	1	5.4	0	42	22.72
VeryOld	1	3.49	1	1	5.5	0	60	22.1
VeryOld	1	11.89	0	1	5.9	0	64	20.76
VeryOld	0	9.58	1	0	5.6	0	69	19.65
VeryOld	1	2.48	2	0	5.6	0	50	29.35
VeryOld	1	8.24	0	0	6.3	0	59	24.33
VeryOld	0	5.19	0	1	6.3	0	46	28.25
VeryOld	0	1.96	1	0	6.3	0	38	25.64
VeryOld	0	5.53	1	1	7.2	1	35	23.14
VeryOld	0	3.95	1	0	6.3	0	53	20.47
VeryOld	1	9.41	1	1	5.5	0	84	22.38
VeryOld	1	21.69	0	1	5.8	0	89	17.22
VeryOld	1	21.5	0	1	5.2	0	89	21.45
VeryOld	0	2.57	1	1	6.1	0	39	26.5
VeryOld	0	6.6	1	2	5.9	0	49	24.79
VeryOld	0	5.23	0	1	5.4	0	83	24.28
VeryOld	1	1.81	1	1	6.1	1	77	23.64
VeryOld	0	12.35	0	0	6.9	1	82	22.08
VeryOld	1	14.45	0	1	5.8	0	77	18.81
VeryOld	0	12.39	0	1	6	0	53	18
VeryOld	1	37.75	0	2	6.3	0	70	14.33
VeryOld	1	4.52	0	1	7	1	39	27.12
VeryOld	0	3.28	1	0	7.1	1	54	22.57
VeryOld	1	6.98	1	1	5.5	0	50	30.14
VeryOld	1	9.31	1	2	5.7	0	46	20.41
VeryOld	0	2.15	2	1	5.6	0	64	28.03
VeryOld	1	9.03	1	0	5.6	0	59	26.1
VeryOld	1	11.95	0	1	5.4	0	59	25.26
VeryOld	1	9.31	1	0	7	1	58	24.67
VeryOld	0	5.23	1	2	5.9	0	29	27.51
VeryOld	1	15.86	0	1	5.7	0	89	22.69
VeryOld	0	2.42	0	1	6.5	1	31	22.09
VeryOld	0	10.94	0	1	5.8	0	51	19.02
VeryOld	0	9.73	0	2	5.4	0	47	23.84
VeryOld	1	8.93	1	1	6.2	0	70	27.59
VeryOld	1	11.43	0	1	6.1	0	67	23.85
VeryOld	1	10.97	0	0	5.8	0	88	23.29
VeryOld	0	6.12	0	0	5.3	0	70	23.65
VeryOld	0	11.49	0	0	5.9	0	67	22.61
VeryOld	1	21.54	0	0	6.4	0	76	21.75
VeryOld	1	5.21	1	0	5.5	0	54	24.69
VeryOld	1	13.78	0	0	5.7	0	54	25.63
VeryOld	0	4.79	0	1	5.8	0	58	26.55
VeryOld	1	7.38	1	0	6.8	1	78	22.53
VeryOld	1	4.98	0	2	6	0	61	22.5
VeryOld	0	2.93	0	0	6.2	0	37	24.99
VeryOld	0	9.29	0	0	6.6	1	65	22.05
VeryOld	1	4.35	0	1	7.3	1	66	21.45
VeryOld	0	13.48	1	2	5.4	0	71	21.79
VeryOld	1	7.82	0	1	6.5	1	74	25.03
VeryOld	0	8.53	0	0	6.1	0	67	27.33
VeryOld	1	7.21	1	1	5.8	0	52	24.76
VeryOld	1	8.53	0	1	5.7	1	51	22.84
VeryOld	1	23.07	0	1	5.5	0	76	17.74
VeryOld	1	23.26	0	0	5.5	0	54	26.07
VeryOld	1	3.32	1	1	5.3	0	42	19.92
VeryOld	1	19.11	0	0	6.1	0	88	25.17
VeryOld	1	9.47	1	1	6.3	0	80	21.57
VeryOld	1	14.91	1	1	6.5	1	76	25.69
VeryOld	1	10.8	1	2	5.8	0	58	21.74
VeryOld	1	7.44	1	1	7.9	1	45	24.11
VeryOld	0	31.07	0	2	6.3	0	43	19.85
VeryOld	1	5.15	0	1	5.6	0	47	23.7
VeryOld	1	23.56	0	1	5.4	0	76	24.81
VeryOld	1	6.26	1	0	5.9	0	77	27.16
VeryOld	1	10.17	1	0	6.2	0	104	20.45
VeryOld	0	6.3	2	0	6.3	1	38	21.36
VeryOld	0	9.92	1	1	5.5	0	61	16.56
VeryOld	1	11.09	0	1	5.6	0	84	24.39
VeryOld	0	10.36	1	0	5.7	1	53	20.9
VeryOld	1	13.04	0	0	5.8	0	46	21.12
VeryOld	1	3.49	1	0	5.8	0	62	20.05
VeryOld	0	3.37	1	1	6.6	1	70	22.98
VeryOld	0	3.35	1	0	5.7	0	41	22.67
VeryOld	1	16.28	0	2	6.2	0	71	19.6
VeryOld	0	15.41	1	1	5.2	0	44	18.56
VeryOld	0	3.79	1	2	6.1	0	54	25.84
VeryOld	0	5.11	0	0	5.9	0	46	23.18
VeryOld	0	2.49	1	0	6.2	0	45	30.12
VeryOld	1	9.62	0	0	6.6	1	53	26.66
VeryOld	1	17.18	0	2	6	0	59	22.07
VeryOld	1	7.21	0	1	6	0	51	25.71
VeryOld	1	9.73	1	1	5.3	0	80	19.08
VeryOld	0	4.39	0	0	5.4	0	27	27.54
VeryOld	1	6.96	1	0	5.8	0	74	23.7
VeryOld	1	7.15	1	0	6.2	0	81	23.25
VeryOld	1	12.2	0	0	6	0	52	31.75
VeryOld	1	13.48	2	1	5.9	0	70	23.18
VeryOld	0	14.99	1	0	7.2	1	62	22.26
VeryOld	1	9.73	0	0	6	0	43	28.5
VeryOld	0	15.6	1	1	4.9	0	78	21.15
VeryOld	1	13.78	0	0	6.5	1	75	22.86
VeryOld	1	11.62	2	0	6	0	45	22.82
VeryOld	1	16.65	1	1	5.7	0	58	25.85
VeryOld	0	18.9	0	1	5	0	86	18.73
VeryOld	0	6.79	1	0	7.6	1	57	22.41
VeryOld	1	6.64	1	0	6.3	1	71	23.26
VeryOld	1	13.65	1	1	5.9	0	73	23.08
VeryOld	0	7.04	1	1	6.2	0	70	23.46
VeryOld	0	4.31	0	1	5.4	0	62	21.47
VeryOld	1	5.49	1	0	5.5	0	61	21.28
VeryOld	1	5.88	2	1	6.4	0	87	24.52
VeryOld	1	10.63	0	1	5.7	0	82	25.12
VeryOld	0	4.81	1	1	5.6	0	77	25.01
VeryOld	1	8.21	1	1	6.5	1	49	23.83
VeryOld	0	8.47	0	0	5.8	0	27	30.71
VeryOld	1	19.4	0	0	6.1	0	71	27.06
VeryOld	0	6.28	1	2	5.4	0	71	22.88
VeryOld	1	15.16	0	0	5.7	0	61	24.69
VeryOld	0	14.22	0	0	5.6	0	62	20.11
VeryOld	1	16.65	1	1	5.3	0	102	17.13
VeryOld	0	20.95	0	2	5.9	0	48	20.51
VeryOld	0	20.7	0	2	5.9	0	56	24.34
VeryOld	1	27.32	0	2	5.4	0	62	17.28
VeryOld	1	4.02	0	1	6.3	0	57	25.38
VeryOld	0	20.87	0	1	7.1	1	61	25.32
VeryOld	1	31.07	0	2	5.6	0	70	21.43
VeryOld	0	2.53	1	1	5.9	0	58	22.97
VeryOld	1	7.38	1	0	6.2	0	53	23.24
VeryOld	1	18.29	0	0	5.7	0	90	21.53
VeryOld	0	10.06	2	1	6.1	0	92	23.08
VeryOld	1	11.41	1	1	5.9	0	87	22.73
VeryOld	0	6.73	1	0	5.8	0	73	23.66
VeryOld	1	5.59	0	1	5.8	0	47	20.9
VeryOld	1	8.99	0	1	5.5	0	52	22.96
VeryOld	0	4.31	0	1	5.8	0	42	23.64
VeryOld	0	22.53	0	0	5.9	0	95	17.25
VeryOld	0	6.56	0	1	6.1	0	38	24.34
VeryOld	1	4.61	0	0	6.2	0	79	30.64
VeryOld	0	6.43	0	0	4.9	0	57	25.41
VeryOld	1	6.72	0	1	5.5	0	45	24.49
VeryOld	0	16.93	0	1	6	0	32	23.06
VeryOld	1	12.22	0	2	5.4	0	59	25.04
VeryOld	1	11.99	1	1	5.9	0	81	19.48
VeryOld	1	10.96	0	1	5.3	0	60	19.82
VeryOld	1	6.64	1	0	6.2	0	60	25.77
VeryOld	1	16.84	0	0	6	0	70	27.79
VeryOld	0	3.51	1	1	6.1	0	54	23.4
VeryOld	1	15.2	1	1	5.6	0	107	22.41
VeryOld	0	3.11	1	1	5.9	0	43	34.55
VeryOld	1	7.61	2	0	5.8	0	69	17.53
VeryOld	1	9.14	0	2	6.4	0	57	22.91
VeryOld	0	18.52	1	0	6.6	1	49	24.47
VeryOld	1	7.69	0	1	6	0	51	23.85
VeryOld	1	33.95	1	2	5.9	0	83	17.73
VeryOld	1	5.4	0	0	7.1	1	39	26.29
VeryOld	0	5.07	1	0	5.8	0	62	25.34
VeryOld	0	4.94	0	1	6.1	0	53	22.48
VeryOld	1	14.79	0	0	7.2	1	50	22.17
VeryOld	1	7.69	1	0	6.1	0	64	21.32
VeryOld	0	2.76	1	1	6	0	46	30.63
VeryOld	1	11.22	0	0	6.5	1	63	21.73
VeryOld	0	11.59	1	0	5.8	0	83	23.31
VeryOld	1	6.66	0	1	5.6	0	72	23.66
VeryOld	1	11.49	0	1	5.9	0	71	23.29
VeryOld	1	8.61	1	1	5.8	0	73	24.09
VeryOld	1	11.99	0	1	8	1	94	23.07
VeryOld	1	4.77	1	0	5.7	0	69	25.95
VeryOld	0	19.59	2	0	6.1	0	61	20.86
VeryOld	0	15.5	0	0	6.2	0	62	20.32
VeryOld	1	6.1	1	1	7.6	1	55	29.49
VeryOld	1	6.14	1	0	6.1	0	92	22.25
VeryOld	1	14.45	0	0	6	0	46	18.81
VeryOld	1	25.59	0	1	6.3	0	74	20.89
VeryOld	1	9.89	2	2	8.2	1	56	23.62
VeryOld	0	14.43	2	0	5.9	0	77	21.2
VeryOld	0	4	0	0	6.8	1	63	22.11
VeryOld	1	13.13	0	0	6.7	1	64	22.12
VeryOld	1	12.43	1	1	5.7	1	66	29.78
VeryOld	0	10.06	0	0	5.7	0	67	20.27
VeryOld	1	6.52	1	2	7.4	1	60	28.96
VeryOld	0	2.76	1	0	5.8	0	28	27.26
VeryOld	1	17.68	1	0	6.2	1	63	27.22
VeryOld	1	13.53	0	0	5.6	0	87	27.78
VeryOld	1	27.27	0	2	4.9	0	71	16.87
VeryOld	1	6.14	1	0	5.7	0	48	26.85
VeryOld	0	2.04	2	0	5.9	0	48	29.74
VeryOld	1	4.9	1	0	7	1	53	27.12
VeryOld	0	11.22	1	1	5.7	0	69	20.69
VeryOld	0	14.01	0	0	5.6	0	61	21.11
VeryOld	1	17.39	0	2	5.6	0	82	30.39
VeryOld	0	21.84	1	1	5.3	0	76	23.85
VeryOld	1	7.42	1	0	5.9	1	66	22.93
VeryOld	1	11.17	0	1	6.5	1	63	20.95
VeryOld	1	7.21	2	0	5.8	0	95	19.76
VeryOld	0	4	1	1	7.9	1	62	25.39
VeryOld	0	4.52	0	1	6.4	0	62	20.01
VeryOld	0	9.06	1	1	5.6	0	81	20.21
VeryOld	1	7.29	0	0	5.7	0	59	19.39
VeryOld	0	7.1	0	1	5.4	0	64	23.29
VeryOld	0	3.79	1	0	5.4	0	50	23.75
VeryOld	1	18.37	0	0	5.4	0	62	21.18
VeryOld	0	7.94	1	0	5.3	0	67	21.12
VeryOld	0	9.85	1	2	5.3	0	106	26.34
VeryOld	0	9.41	1	2	5.3	0	75	20.06
VeryOld	0	3.91	1	1	6.7	1	35	28.33
VeryOld	0	6.39	1	1	5.8	0	46	23.73
VeryOld	0	3.51	1	0	6.2	0	45	25.96
VeryOld	0	16.99	0	1	5.9	0	73	22.43
VeryOld	1	16.42	1	1	5.7	0	85	19.61
VeryOld	1	39.19	0	2	5.9	0	73	24.47
VeryOld	0	4.29	0	1	8.5	1	79	23.08
VeryOld	1	9.08	1	0	5.8	0	48	22.89
VeryOld	1	24.1	0	2	5.7	0	76	20.04
VeryOld	0	21.21	1	0	5.4	0	57	19.93
VeryOld	1	15.9	0	1	5.8	0	65	21.17
VeryOld	1	4.31	0	1	7	1	55	24.98
VeryOld	1	28.97	0	1	5.9	0	88	20.1
VeryOld	1	7.19	0	0	6	0	53	28.38
VeryOld	0	4.6	1	0	5.6	0	39	25.55
VeryOld	0	6.72	0	2	6	0	50	25.08
VeryOld	1	13.65	0	0	6.3	0	61	20.54
VeryOld	1	7.25	2	2	6.1	0	87	20.98
VeryOld	0	5.38	1	1	5.4	0	50	25.41
VeryOld	0	7.8	0	0	6	0	33	23
VeryOld	1	27.63	0	1	5.7	0	85	18.78
VeryOld	1	9.66	1	1	6.2	0	92	25.79
VeryOld	0	15.35	0	2	5.8	0	55	15.71
VeryOld	0	4.61	0	0	6	0	40	23.88
VeryOld	0	3.95	1	0	5.6	0	55	28.93
VeryOld	1	36.76	1	1	5.8	0	66	21.88
VeryOld	0	34.79	0	2	5.9	0	58	23.27
VeryOld	0	14.05	0	0	6.5	1	67	24.16
VeryOld	0	28.95	0	1	6.1	0	85	28.25
VeryOld	1	7.79	2	1	6.5	1	56	24.55
VeryOld	1	13.88	0	0	6.8	1	64	20.47
VeryOld	0	32.08	0	1	5.9	0	69	20.52
VeryOld	0	11.43	0	1	6	0	49	17.53
VeryOld	0	8.11	1	1	5.5	0	62	21.36
VeryOld	0	12.48	0	2	5.6	0	56	22.06
VeryOld	1	42.89	0	1	5.7	0	84	21.67
VeryOld	0	4.27	1	0	5.5	0	65	24.97
VeryOld	1	8.05	0	1	6.2	0	51	26.09
VeryOld	1	4.98	1	1	5.6	0	54	21.43
VeryOld	0	5	1	0	5.9	0	38	26.13
VeryOld	0	12.87	0	1	6.3	0	64	19.14
VeryOld	1	9.45	0	1	5.8	0	43	18.79
VeryOld	1	7.08	0	1	7.5	1	64	20.18
VeryOld	0	6.24	0	1	6.1	0	39	30.75
VeryOld	0	4.27	1	2	5.9	0	54	22.92
VeryOld	0	4.58	2	2	5.3	0	50	15.94
VeryOld	1	10.75	0	1	5.1	0	68	21.34
VeryOld	0	5.84	0	0	6.2	0	66	23.06
VeryOld	0	4.88	0	0	6	0	57	19.64
VeryOld	0	4.58	2	0	6.3	0	62	23.11
VeryOld	0	7.46	0	0	5.4	0	49	24.15
VeryOld	0	6.2	1	2	5.7	0	55	20.36
VeryOld	1	13.34	1	1	6	0	41	27.3
VeryOld	1	5.17	0	2	6.5	1	54	23.03
VeryOld	0	5.3	1	0	5.3	0	59	25.27
VeryOld	1	24.15	0	0	6.1	0	85	26.53
VeryOld	0	6.54	0	1	6.1	0	53	25.91
VeryOld	1	6.66	1	1	5.9	0	87	32.22
VeryOld	1	4.48	0	0	5.8	0	56	21.08
VeryOld	0	16.84	1	1	5.9	0	71	17.42
VeryOld	1	8.19	1	0	6.1	0	50	23.31
VeryOld	0	10.71	0	1	6.1	0	69	26.14
VeryOld	0	4.75	1	0	7.8	1	44	27.24
VeryOld	0	12.43	0	1	6.5	1	69	24.06
VeryOld	0	4.1	1	1	5.5	0	64	21.51
VeryOld	0	9.85	0	1	6.4	0	41	23.32
VeryOld	1	10.61	2	0	5.8	0	94	18.48
VeryOld	1	19.25	0	1	5.4	0	105	19.04
VeryOld	0	8.11	0	1	5.3	0	77	23.26
VeryOld	0	8.3	0	0	5.9	0	38	23.18
VeryOld	0	3.72	1	1	5.5	0	48	23.7
VeryOld	1	11.57	0	1	5.6	0	73	15.43
VeryOld	0	8.32	0	0	5.3	0	57	24.07
VeryOld	1	6.45	1	0	5.6	0	51	22.56
VeryOld	0	10.38	1	1	5.2	0	44	24.83
VeryOld	1	27.76	0	1	5.5	0	95	19.7
VeryOld	0	9.71	0	0	6	0	49	21.91
VeryOld	0	19.25	0	0	5.8	0	67	19.05
VeryOld	1	16.27	0	0	5.7	0	87	19.37
VeryOld	1	6.1	2	0	5.8	0	32	24.74
VeryOld	1	30.61	0	0	5.7	0	82	21.02
VeryOld	1	8.22	1	1	7.7	1	69	21.19
VeryOld	1	10.67	0	1	5.8	0	54	26.47
VeryOld	0	4.84	0	1	6	0	36	23.11
VeryOld	1	41.13	0	0	5.8	0	60	19.95
VeryOld	0	1.73	2	0	6.2	0	40	26.11
VeryOld	0	12.71	0	0	5.9	0	27	25.87
VeryOld	1	25.13	0	2	6.3	0	75	21.92
VeryOld	1	31.22	0	2	6	0	97	21.69
VeryOld	1	15.27	0	0	5.8	0	90	15.79
VeryOld	0	4.67	1	2	5.7	0	50	24.1
VeryOld	0	9.27	0	1	6	0	59	21.68
VeryOld	1	12.08	0	1	5.6	0	60	20.65
VeryOld	0	5.53	1	0	6.2	0	41	26.2
VeryOld	1	8.09	1	0	6.1	0	56	22.35
VeryOld	0	15.88	0	1	5.9	0	79	23.03
VeryOld	1	15.12	1	2	6.8	1	63	18.53
VeryOld	1	27.1	0	2	5.6	0	87	16.97
VeryOld	0	4.73	2	0	5.7	0	56	19.64
VeryOld	1	12.41	0	1	6	0	45	25.68
VeryOld	0	4.81	1	2	6.4	0	35	25.39
VeryOld	0	4.1	0	0	6.3	0	52	36.59
VeryOld	1	20.85	0	1	5.8	0	50	20.49
VeryOld	0	11.26	2	1	5.7	0	47	23.23
VeryOld	0	3.28	1	0	5.8	0	70	19.32
VeryOld	0	9.96	1	1	5.7	0	57	28.17
VeryOld	0	5.95	0	0	6.2	0	47	18.11
VeryOld	0	19.32	0	0	6.4	0	72	16.07
VeryOld	0	7.46	0	0	5.7	0	75	22.81
VeryOld	0	8.93	0	0	5.8	0	49	24.99
VeryOld	1	21.06	1	1	5.6	0	77	23.07
VeryOld	0	6.91	0	1	5.4	0	65	24.15
VeryOld	1	10.61	1	2	5.7	0	54	26.76
VeryOld	0	8.26	1	0	6.3	0	74	19.71
VeryOld	0	4.77	0	1	6.9	1	49	22.65
VeryOld	0	8.53	1	2	5.6	0	49	26.18
VeryOld	1	19.3	0	1	6.1	0	69	25.24
VeryOld	0	33.46	0	1	5.7	0	73	21.68
VeryOld	0	2.46	1	0	6.4	0	42	23.2
VeryOld	1	8.36	0	0	6	0	57	22.89
VeryOld	1	12.66	0	0	6.1	0	47	23.54
VeryOld	1	23.12	1	1	5.9	0	80	27.95
VeryOld	0	15.96	0	1	6.3	0	77	26.69
VeryOld	1	12.88	0	0	5.6	0	96	18.63
VeryOld	0	7.92	0	0	6	0	60	21.89
VeryOld	0	12.96	1	0	5.5	0	68	21.89
VeryOld	0	14.07	1	1	6	0	40	25.61
VeryOld	1	3.7	1	2	6.4	0	36	25.04
VeryOld	0	5.74	1	1	6.2	0	41	27.85
VeryOld	1	12.92	1	0	5.8	0	78	19.48
VeryOld	0	10.4	0	1	5.6	0	46	33.16
VeryOld	1	9.24	1	0	5.6	0	51	25.92
VeryOld	0	16.23	1	0	6	0	70	24.3
VeryOld	1	8.78	1	1	6.6	1	84	28.38
VeryOld	1	5.57	2	2	5.5	0	45	28.09
VeryOld	1	13.09	1	1	5.6	0	69	18.67
VeryOld	1	27.13	0	1	6	0	52	19.65
VeryOld	0	6.56	0	1	7.5	1	42	22.5
VeryOld	1	13.17	1	1	5.7	0	54	20.38
VeryOld	0	9.41	1	1	5.4	0	70	25.25
VeryOld	0	4.71	0	1	7.5	1	39	22.7
VeryOld	1	15.64	0	0	6.2	0	67	19.21
VeryOld	0	7.65	0	1	7.9	1	74	23
VeryOld	0	10.06	1	0	6.1	0	44	26.92
VeryOld	1	13.32	0	0	5.5	0	76	24.97
VeryOld	0	6.73	1	1	5.7	0	37	25.48
VeryOld	0	9.27	1	1	5.5	0	80	24.11
VeryOld	0	12.62	0	1	6.3	0	49	23.14
VeryOld	0	6.12	0	0	5.8	0	52	23.06
VeryOld	1	14.57	0	0	6.2	0	59	27.29
VeryOld	1	12.39	0	1	6.1	0	68	20.82
VeryOld	1	22.09	0	0	6.3	0	93	24.07
VeryOld	1	10.15	1	1	5.7	0	74	20.55
VeryOld	1	14.97	0	0	6.3	0	66	17.08
VeryOld	0	9.06	0	0	5.8	0	49	23.97
VeryOld	1	9.73	0	0	6	0	80	25.18
VeryOld	0	5.59	1	1	5.5	0	39	24.91
VeryOld	1	10.52	0	1	5.7	0	60	22.7
VeryOld	0	5.26	1	0	6	0	64	26.46
VeryOld	0	6.41	1	0	6	0	53	24.48
VeryOld	0	13.06	0	0	5.6	0	36	21.33
VeryOld	1	24	0	2	6.1	0	57	20.79
VeryOld	1	18.25	0	0	5.8	0	86	24.76
VeryOld	0	12.24	1	0	6.2	0	108	21.48
VeryOld	0	8.66	0	0	6.6	1	39	21.47
VeryOld	1	8.32	0	0	6.7	1	46	25.85
VeryOld	0	8.26	1	0	6	0	51	23.01
VeryOld	1	17.6	1	1	5.8	0	58	22.04
VeryOld	1	9.5	1	1	6.9	1	67	22.91
VeryOld	1	6.77	0	0	6	0	53	19.45
VeryOld	0	12.58	0	1	6.2	0	65	22.39
VeryOld	1	2.17	0	0	6.3	0	64	28.12
VeryOld	0	6.83	1	0	6.1	0	66	29.23
VeryOld	1	14.6	1	0	5.9	0	81	20.83
VeryOld	1	8.43	1	1	5.7	0	50	25.8
VeryOld	1	8.76	2	0	6	0	45	26.02
VeryOld	0	5.68	2	1	5.7	0	69	29.24
VeryOld	1	10.48	1	0	6.1	0	64	17.82
VeryOld	1	5.91	0	1	6.6	1	36	22.92
VeryOld	1	11.61	1	0	5.6	0	63	19.78
VeryOld	1	6.89	1	1	6.7	1	55	22.28
VeryOld	1	13.63	0	2	5.8	0	66	23.7
VeryOld	1	8.59	0	2	5.5	0	62	24.35
VeryOld	1	23.22	0	1	6.1	1	80	26.51
VeryOld	0	5	0	0	5.8	0	44	21.91
VeryOld	1	6.49	0	1	5.7	0	35	25.15
VeryOld	0	11.7	0	2	5.6	0	41	24.9
VeryOld	0	1.9	1	0	6.2	0	32	24.06
VeryOld	1	8.87	1	0	5.6	0	82	19.04
VeryOld	0	21.16	0	2	5.4	0	62	23.99
VeryOld	0	9.35	0	1	6.2	0	53	27.75
VeryOld	0	3.77	1	0	6	0	38	21.8
VeryOld	0	3.39	1	0	5.5	0	50	25.03
VeryOld	0	10.76	0	0	5.6	0	57	25
VeryOld	1	10.4	0	1	6.1	1	51	28.47
VeryOld	0	3.3	1	1	7.5	1	50	20.39
VeryOld	1	22.89	0	1	5.9	0	54	22.29
VeryOld	0	3.81	0	1	5.5	0	51	21.06
VeryOld	0	13.57	0	1	5.6	0	46	22.02
VeryOld	1	9.31	1	0	7.2	1	58	20.11
VeryOld	1	6.68	1	2	5.8	0	65	25.89
VeryOld	0	6.83	0	0	7.7	1	41	23.25
VeryOld	1	3.45	1	0	6.3	0	39	23.42
VeryOld	0	14.49	0	0	5.3	0	57	25.34
VeryOld	0	4.75	1	1	5.2	0	55	23.46
VeryOld	1	18.25	0	2	6.2	0	53	17.87
VeryOld	0	5.82	1	2	5.5	0	57	22.81
VeryOld	1	12.69	1	1	5.7	0	63	21.47
VeryOld	1	8.4	1	0	6.1	0	98	24.97
VeryOld	0	13.21	0	2	5.5	0	44	22.77
VeryOld	1	9.43	1	2	6	0	75	22.73
VeryOld	1	13.48	1	1	5.9	0	64	23.79
VeryOld	1	17.89	0	2	5.7	0	84	16.98
VeryOld	0	5.23	1	0	6.2	0	59	22.29
VeryOld	1	21.65	0	0	5.8	0	101	19.43
VeryOld	0	6.79	0	0	5.8	0	82	27.5
VeryOld	0	2.27	1	0	8	1	42	20.72
VeryOld	0	16.97	1	2	6.1	0	71	14.94
VeryOld	0	2.04	1	0	5.6	0	30	23.01
VeryOld	0	4.42	1	1	6.2	1	38	19.9
VeryOld	1	5.89	1	1	5.7	0	109	26.45
VeryOld	1	4.77	0	0	5.9	0	30	18.15
VeryOld	0	10.13	1	1	5.7	0	55	22.63
VeryOld	0	7.02	0	0	5.7	0	57	22.79
VeryOld	1	12.27	0	0	6.2	0	61	19.45
VeryOld	0	8.99	0	0	6	0	58	17.9
VeryOld	1	6.09	2	1	6.1	0	63	21.3
VeryOld	0	8.28	0	0	5.8	0	53	24.79
VeryOld	1	4.44	1	2	6.5	1	60	25.68
VeryOld	1	9.35	0	1	5.5	0	75	20.58
VeryOld	1	6.33	1	1	5.8	0	51	28.95
VeryOld	0	3.51	0	0	6.3	0	43	19.8
VeryOld	0	9.18	0	0	5.6	0	61	17.03
VeryOld	0	1.39	0	0	5.4	0	50	27.29
VeryOld	0	6.18	1	0	6.4	1	58	24.11
VeryOld	1	8.4	2	1	5.7	0	58	26.15
VeryOld	1	5.36	1	1	5.8	0	47	18.66
VeryOld	1	7.96	2	1	5.7	0	77	20.49
VeryOld	0	2.97	2	0	5.8	0	34	23.75
VeryOld	1	17.43	0	2	5.3	0	62	22.02
VeryOld	1	7	1	0	6.2	0	73	22.96
VeryOld	0	6.37	1	0	8.2	1	55	21.03
VeryOld	1	35.44	0	2	5.5	0	67	17.19
VeryOld	1	7.31	0	1	5.5	0	78	20.5
VeryOld	0	13.13	0	2	5.5	0	86	21.72
VeryOld	1	15.37	0	0	5.6	0	63	21.31
VeryOld	1	21.71	1	1	6.6	1	81	19.39
VeryOld	1	9.75	1	1	5.5	0	64	21.21
VeryOld	0	3.83	0	0	6.7	1	52	24.72
VeryOld	1	4.06	0	1	7.7	1	37	23.56
VeryOld	0	5	1	0	6.3	0	57	24.72
VeryOld	1	9.26	0	0	5.6	0	58	21.42
VeryOld	0	42.2	1	1	6.7	1	49	33.09
VeryOld	0	7.14	0	0	5.7	0	60	23.26
VeryOld	1	6.31	0	1	5.9	0	56	27.59
VeryOld	1	20.31	0	1	5.8	0	66	22.12
VeryOld	0	4.06	1	1	5.7	0	46	26.5
VeryOld	1	4.81	0	0	6.4	0	43	22.26
VeryOld	1	14.76	1	2	5.5	0	67	22.2
VeryOld	0	9.75	1	2	5.3	0	59	20.9
VeryOld	0	5.42	0	1	5	0	56	22.73
VeryOld	0	3.47	1	0	5.5	0	67	27.54
VeryOld	0	6.77	0	1	5.8	0	50	22.93
VeryOld	0	17.39	0	1	5.6	0	85	21.62
VeryOld	1	15.98	0	1	5.5	0	58	19.56
VeryOld	1	20.91	0	1	6.2	0	75	23.66
VeryOld	0	21.82	1	0	6	0	56	21.93
[truncated: 311 more rows]
