# Supplementary material for: Status and physiological significance of circulating adiponectin in the very old and centenarians: an observational study
Source: eLife journal article supplement (doi:10.7554/elife.86309), 2023-09-28
Supplement: supp [file elife-86309-supp-v1.zip]

a

## Centenarians (n=967)

Study: Tokyo Centenarian Study (TCS) ref: Gondo Y. *et al* (2006)  
 Target age:  $\geq 100$ yo.  
 Entry period: Sept. 2000 ~ Oct 2003  
 Follow up period: ~ July 2018  
 Number of Entry: 238

Study: Japan Semi-supercentenarian Study (JSS) ref:  
 Target age:  $\geq 105$ yo. ref: Arai Y. *et al* (2014)  
 Entry period: Sept. 2002 ~ March 2019  
 Follow up period: ~ March. 2019  
 Number of Entry: 729

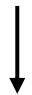

no cHMW Adiponectin data: 155

**812** (127 men (median age: 105.3 yo [IQR: 100.9–106.8]),  
 685 women (median age: 106.0 yo [IQR: 103.9–107.2]))

ref:

Gondo Y, *et al*. Functional status of centenarians in Tokyo, Japan: developing better phenotypes of exceptional longevity. *J Gerontol A Biol Sci Med Sci* **61**, 305-310 (2006).

Arai Y, *et al*. Physical independence and mortality at the extreme limit of life span: supercentenarians study in Japan. *J Gerontol A Biol Sci Med Sci* **69**, 486-494 (2014).

Arai Y, *et al*. The Tokyo Oldest Old survey on Total Health (TOOTH): a longitudinal cohort study of multidimensional components of health and well-being. *BMC Geriatr* **10**, 35 (2010).

Arai Y, *et al*. Behavioral changes and hygiene practices of older adults in Japan during the first wave of COVID-19 emergency. *BMC Geriatr* **21**, 137 (2021).

b

## The very old (n=1,568)

Study: The Tokyo Oldest Old Survey on Total Health (TOOTH)  
 Target age:  $\geq 85$ yo. ref: Arai Y *et al*. (2010)  
 Entry period: March 2008 ~ Dec. 2009  
 Follow up period: ~ Jan. 2016  
 Number of Entry: 542

Study: Kawasaki Aging and Wellbeing Project (KAWP)  
 Target age: 85-89yo. ref: Arai Y *et al*. (2021)  
 Entry period: March, 2017 ~ Dec. 2019  
 Follow up period: ~ Sep 2022  
 Number of Entry: 1026

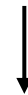

no cHMW Adiponectin data: 7  
 out of age ( $\geq 90$  yo): 63

**1,498** (724 men (median age: 86.9 [IQR: 85.9–88.2]),  
 774 women (median age: 87.0 years [IQR: 86.0–88.4]))
