# Supplementary material for: Status and physiological significance of circulating adiponectin in the very old and centenarians: an observational study
Source: eLife journal article supplement (doi:10.7554/elife.86309), 2023-09-28
Supplement: supp [file elife-86309-supp-v1.zip]

a. Centenarian men

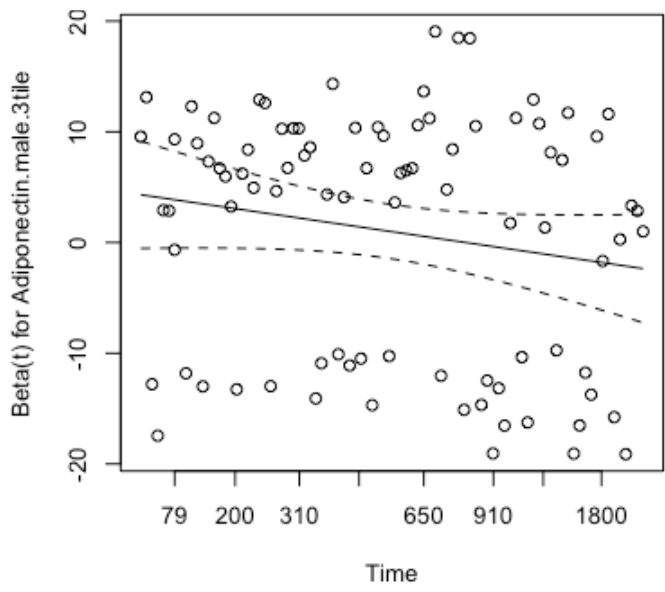

|                        | chisq  | df | p     |
|------------------------|--------|----|-------|
| Adiponectin.male.3tile | 3.513  | 2  | 0.173 |
| Age                    | 3.243  | 1  | 0.072 |
| HDL                    | 0.957  | 1  | 0.328 |
| rs4783244              | 0.152  | 1  | 0.697 |
| BMI                    | 0.711  | 1  | 0.399 |
| GLOBAL                 | 12.810 | 6  | 0.046 |

b. Centenarian women

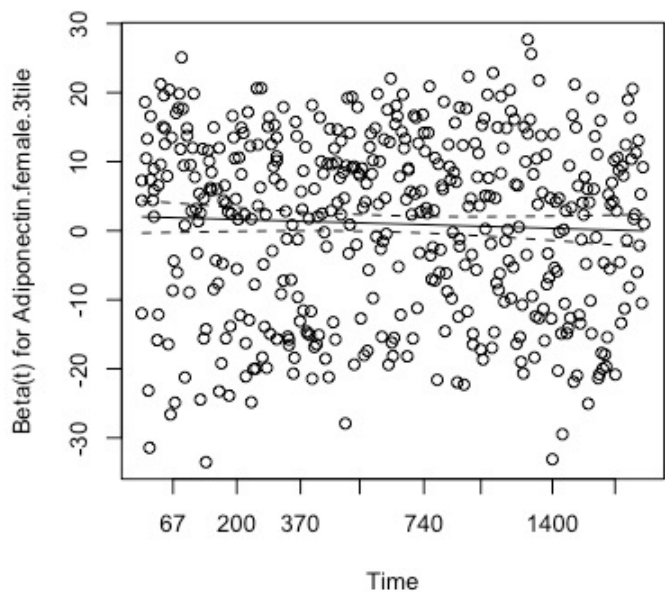

|                          | chisq    | df | p    |
|--------------------------|----------|----|------|
| Adiponectin.female.3tile | 1.35e+00 | 2  | 0.51 |
| Age                      | 4.25e-01 | 1  | 0.51 |
| HDL                      | 5.03e-02 | 1  | 0.82 |
| rs4783244                | 1.63e-08 | 1  | 1.00 |
| BMI                      | 5.93e-01 | 1  | 0.44 |
| GLOBAL                   | 2.19e+00 | 6  | 0.90 |
