# Supplementary material for: Status and physiological significance of circulating adiponectin in the very old and centenarians: an observational study
Source: eLife journal article supplement (doi:10.7554/elife.86309), 2023-09-28
Supplement: supp [file elife-86309-supp-v1.zip]

a. Very old men

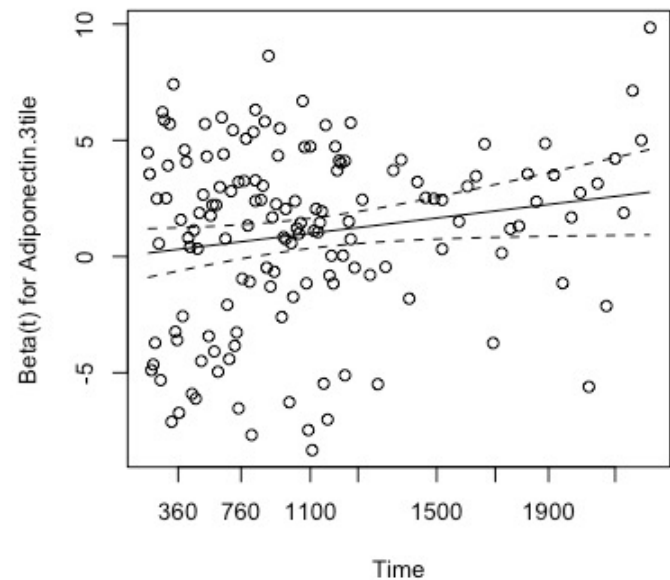

|                    | chisq   | df | p     |
|--------------------|---------|----|-------|
| Adiponectin.3tile  | 5.6258  | 2  | 0.060 |
| Age                | 0.4014  | 1  | 0.526 |
| cohort             | 3.3586  | 1  | 0.067 |
| HDLC               | 0.2860  | 1  | 0.593 |
| DM                 | 0.0184  | 1  | 0.892 |
| rs11711353         | 0.1363  | 1  | 0.712 |
| rs4783244          | 0.5392  | 1  | 0.463 |
| years of education | 2.4766  | 1  | 0.116 |
| BMI                | 0.9791  | 1  | 0.322 |
| GLOBAL             | 14.6985 | 10 | 0.143 |

b. Very old women

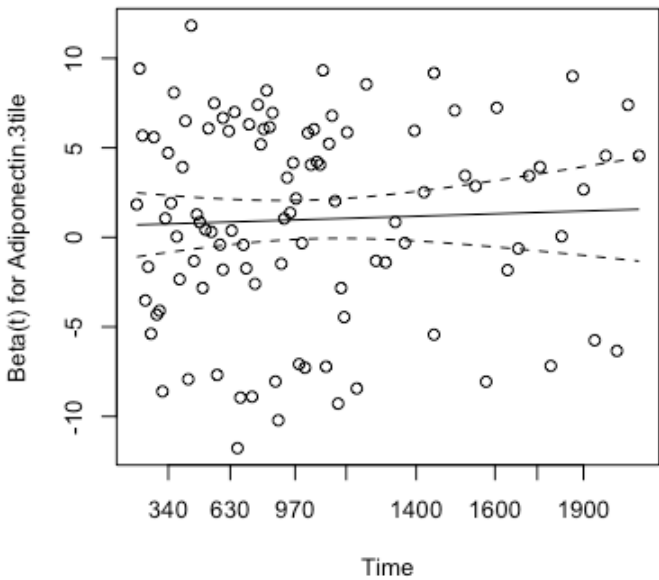

|                       | chisq   | df | p    |
|-----------------------|---------|----|------|
| Adiponectin.3tile     | 0.21036 | 2  | 0.90 |
| Age                   | 0.33001 | 1  | 0.57 |
| cohort                | 1.96893 | 1  | 0.16 |
| HDLC                  | 0.00235 | 1  | 0.96 |
| DM_adipo              | 0.80508 | 1  | 0.37 |
| rs11711353_num.taqman | 1.51935 | 1  | 0.22 |
| rs4783244_num.taqman  | 0.01977 | 1  | 0.89 |
| years_of_education    | 0.06784 | 1  | 0.79 |
| BMI                   | 0.74597 | 1  | 0.39 |
| GLOBAL                | 6.93027 | 10 | 0.73 |
