# Supplementary material for: Status and physiological significance of circulating adiponectin in the very old and centenarians: an observational study
Source: eLife. 2023 Sep 28;12:e86309. doi: 10.7554/eLife.86309 (PMC10564453; doi:10.7554/eLife.86309)
Supplement: Supplementary file 1. — Abbreviations: IQR, interquartile range; BMI, body mass index; SBP, systolic blood pressure; IADLs, instrumental activities of daily living; ADLs, activities of daily living; MMSE, mini-mental state examination; HMW, high molecular weight; HDLC, high-density lipoprotein cholesterol; LDLC, low-density lipoprotein cholesterol; TCHO, total cholesterol; TG, triglyceride; CHE, choline esterase; AST, aspartate aminotransferase; γGTP, γ-glutamyl transpeptidase; LDH, lactate dehydrogenase; UA, uric acid; ALB, albumin; Alt, alternative; MAF, minor allele frequency. [file elife-86309-supp1.xlsx]

## Sheet: Supplementary File 1
				Supplementary File 1. Participants' characteristics at enrollment
					Very old men				Very old women				men vs women		Centenarian men				Centenarian women				men vs women		The very old vs Centenarian
					N	(85-89 years)			N	(85-89 years)			P		N	(100-111 years)			N	(100-111 years)			P		P (men)	P (women)
				Basic information
				Age at enrollment (years old), median (IQR)1	724	86.9	(85.9 - 88.2)		774	87	(86.0 - 88.4)		0.0553		127	105.3	(100.9 - 106.8)		685	106	(103.9 - 107.2)		0.001		<0.0001	<0.0001
				BMI (kg/m2), median (IQR)1	722	23	(21.1 - 24.9)		774	22.2	(20.1 - 24.5)		<0.0001		94	19.4	(17.4 - 21.5)		462	19	(17.1 - 21.4)		0.2243		<0.0001	<0.0001
				SBP (mmHg), median, (IQR)1	722	141.5	(128.5 - 155.5)		774	142.2	(130.0 - 155.0)		0.2709		124	138.5	(120.8 - 155.2)		661	133	(120.0 - 150.0)		0.08236		0.1131	<0.0001
				Years of Education (years), median (IQR)1	720	12	(9 - 16)		772	10	(9 - 12)		<0.0001		-	-	-		-	-	-		-		-	-
				Smoking history, no (%)3	718	543	0.756		764	77	0.101		<0.0001		105	41	0.39		518	47	0.091		<0.0001		<0.0001	0.6162
				Survival analysis
				No of death, no (%)	723	161	0.223		771	103	0.134		<0.0001		124	123	0.992		682	676	0.991		1		<0.0001	<0.0001
				Survival days (days) in dead, median (IQR)1	161	983	(616 - 1313)		103	885	(569 - 1336)		0.3535		122	512	(237 - 978)		674	556	(242 - 1084)		0.4847		<0.0001	<0.0001
				Pysical and Cognitive function
				IADL score, median (IQR)1	720	5	(5 - 5)		763	5	(5 - 5)		0.0266		-	-	-		-	-	-		-		-	-
				ADL score, median (IQR)1	-	-	-		-	-	-		-		127	55	(30 - 90)		685	20	(5 - 50)		<0.0001		-	-
				Hand grip (kg), median (IQR)1	717	26.5	(23 - 29.8)		768	17.5	(15 - 19.8)		<0.0001		-	-	-		-	-	-		-		-	-
				Cognitive impairment (MMSE), median (IQR)1	717	27	(24 - 29)		767	26	(24 - 29)		0.8299		107	15	(10 - 22)		447	10	(6 - 16)		<0.0001		<0.0001	<0.0001
				WHO5 score, median (IQR)1	710	19	(15 - 22)		756	19	(15 - 22)		0.6682		-	-	-		-	-	-		-		-	-
				Medical history
				Heart disease, no (%)3	723	214	(29.6)		770	153	(19.9)		<0.0001		125	37	(29.6)		673	200	(29.7)		1		1	<0.0001
				Diabetes, no (%)3	718	118	(16.4)		760	83	(10.9)		0.002573		127	5	(3.9)		679	31	(4.6)		0.9357		0.000393	<0.0001
				Cancers, no (%)3	719	184	(25.6)		762	113	(14.8)		<0.0001		127	17	(13.4)		678	67	(9.9)		0.3043		0.004153	0.005892
				Renal disease, no (%)3	719	86	(12.0)		766	61	(8.0)		0.01274		126	7	(5.6)		679	50	(7.4)		0.5908		0.04942	0.7427
				Fracture, no (%)3	723	163	(22.5)		769	277	(36.0)		<0.0001		127	40	(31.5)		680	407	(59.9)		<0.0001		0.03853	<0.0001
				Medication
				Anti-diabetec drugs, no (%)	713	87	(12.2)		757	61	(8.1)		0.6022		125	1	(0.8)		669	13	(1.9)		0.6022		0.0002356	<0.0001
				Insulin Injuction, no (%)	713	15	(2.1)		757	4	(0.5)		0.0146		125	0	(0)		669	0	(0)		-		-	-
				Biomakers in plasma
				HMW Adiponectin (mg/mL) median (IQR)1	724	7.05	(4.40 - 11.08)		774	10.52	(6.88 - 16.65)		<0.0001		127	16.6	(12.29 - 22.30)		685	18.53	(13.40 - 25.09)		0.01627		<0.0001	<0.0001
				HDLC (mg/dL), median (IQR)1	724	54	(45 - 65)		774	63	(54 - 74)		<0.0001		127	47	(41.5 - 57)		684	47	(39 - 56)		0.1354		<0.0001	<0.0001
				LDLC (mg/dL), median (IQR)1	724	106	(87 - 125)		774	117	(97 - 134)		<0.0001		127	90	(73.5 - 103)		684	100	(83 - 123)		<0.0001		<0.0001	<0.0001
				TCHO (mg/dL), median (IQR)1	724	189	(168 - 210)		774	210	(187 - 231)		<0.0001		127	156	(140 - 175.5)		684	167	(144 - 192)		0.001209		<0.0001	<0.0001
				TG (mg/dL), median (IQR)1	724	113	(77 - 152)		774	111	(79 - 154)		0.9936		127	81	(60 - 112.5)		684	83	(67 - 113)		0.197		<0.0001	<0.0001
				CHE (U/L), median (IQR)1	724	273	(235.8 - 310)		774	297	(258 - 335)		<0.0001		126	198.5	(163.2 - 232.8)		682	197	(167 - 234)		0.6778		<0.0001	<0.0001
				AST (U/L), median (IQR)1	724	22	(19 - 26.2)		774	22	(19 - 26)		0.5269		-	-	-		-	-	-
				gGTP (U/L), median (IQR)1	724	22	(17 - 32.2)		774	17	(14 - 24.8)		<0.0001		127	17	(13 - 23)		684	13	(10 - 17)		<0.0001		<0.0001	<0.0001
				LDH (U/L), median (IQR)1	724	190.5	(169 - 215)		774	203	(182.2 - 231)		<0.0001		-	-	-		-	-	-
				UA (mg/dL), median (IQR)1	724	5.8	(5 - 6.7)		774	5	(4.2 - 5.8)		<0.0001		126	5.7	(4.7 - 6.5)		684	5.1	(4.2 - 6.3)		<0.0001		0.1168	0.01033
				ALB (g/dL), median (IQR)1	724	4.1	(3.9 - 4.3)		774	4.2	(4.0 - 4.3)		0.2957		127	3.6	(3.3 - 3.9)		684	3.4	(3.2 - 3.7)		0.001175		<0.0001	<0.0001
				Hemoglobin A1c (%), median (IQR)1	723	5.8	(5.6 - 6.2)		774	5.8	(5.6 - 6.1)		0.4103		126	5.6	(5.3 - 5.9)		676	5.5	(5.2 - 5.8)		0.03973		<0.0001	<0.0001
				Cystatin C (mg/L) median, (IQR)1	715	1.2	(1.0 - 1.4)		762	1.1	(0.9 - 1.2)		<0.0001		122	1.7	(1.3 - 2.0)		650	1.6	(1.3 - 2.0)		0.7506		<0.0001	<0.0001
				NTproBNP (ng/mL) median (IQR)1	683	153	(87 - 302)		752	163	(99 - 283.2)		0.2104		93	907	(426 - 1910)		477	901	(455 - 1710)		0.9096		<0.0001	<0.0001
				Interleukin-6 (pg/mL), median (IQR)1	724	2.4	(1.7 - 3.5)		773	2	(1.4 - 2.9)		<0.0001		126	3.1	(2.4 - 4.9)		683	3.2	(2.3 - 5.2)		0.8368		<0.0001	<0.0001
				Genotype / Sequencing
				CDH13 rs4783244 Alt allele, no. (MAF)2	722	427	0.295706		774	459	0.296512		0.168		127	83	0.326772		682	399	0.292522		0.1938		0.3155	0.06616
				ADIPOQ rs11711353 Alt allele, no. (MAF)2	724	493	0.34047		774	565	0.364987		0.3528		127	89	0.350394		682	529	0.38783		0.4923		0.7141	0.2713
