# Supplementary material for: Status and physiological significance of circulating adiponectin in the very old and centenarians: an observational study
Source: eLife. 2023 Sep 28;12:e86309. doi: 10.7554/eLife.86309 (PMC10564453; doi:10.7554/eLife.86309)
Supplement: Supplementary file 2. [file elife-86309-supp2.xlsx]

## Sheet: Supplementary File 2
	Supplementary File 2. Coefficients for generalized linear model analysis of plasma HMW adiponectin level in very old men (n=643)
	Estimate	Estimate	Std. Error	t-value	Pr(>|t|)	OR (95%CI)
	(Intercept)	9.086	0.365	24.8956	0	8830.67	(4318.48 - 18057.46)
	HDLC	1.8333	0.2297	7.9803	0	6.2545	(3.99 - 9.81)
	LDH	0.9887	0.2066	4.7855	0	2.6878	(1.79 - 4.03)
	CDH13 rs4783244	-1.9176	0.3272	-5.8601	0	0.147	(0.08 - 0.28)
	TG	-0.9598	0.2363	-4.062	0.0001	0.383	(0.24 - 0.61)
	NTproBNP	0.7216	0.2094	3.4465	0.0006	2.0578	(1.37 - 3.10)
	rGTP	-0.6313	0.2092	-3.018	0.0026	0.5319	(0.35 - 0.80)
	CHE	-0.6673	0.2241	-2.9782	0.003	0.5131	(0.33 - 0.80)
	GRIP	-0.562	0.212	-2.6514	0.0082	0.5701	(0.38 - 0.86)
	BMI	-0.5495	0.2219	-2.4768	0.0135	0.5772	(0.37 - 0.89)
	ALB	-0.511	0.2172	-2.3528	0.0189	0.5999	(0.39 - 0.92)
	RENAL	1.3901	0.6714	2.0704	0.0388	4.0152	(1.08 - 14.97)
	ADIPOQ rs11711353	0.6091	0.299	2.0372	0.0421	1.8388	(1.02 - 3.30)
	CytC	0.4659	0.2356	1.9771	0.0485	1.5934	(1.00 - 2.53)
	IADL_SUM	-0.3989	0.2028	-1.9671	0.0496	0.671	(0.45 - 1.00)
	Age	0.2149	0.2058	1.0439	0.2969	1.2397	(0.83 - 1.86)
	FX	0.4719	0.4823	0.9783	0.3283	1.603	(0.62 - 4.13)
	HBA1c	0.0971	0.2059	0.4719	0.6372	1.102	(0.74 - 1.65)
	UA	0.0457	0.2153	0.2123	0.8319	1.0468	(0.69 - 1.60)
	years_of_education	-0.0423	0.2036	-0.208	0.8353	0.9585	(0.64 - 1.43)
