# Supplementary material for: Status and physiological significance of circulating adiponectin in the very old and centenarians: an observational study
Source: eLife. 2023 Sep 28;12:e86309. doi: 10.7554/eLife.86309 (PMC10564453; doi:10.7554/eLife.86309)
Supplement: Supplementary file 3. [file elife-86309-supp3.xlsx]

## Sheet: Supplementary File 3
	Supplementary File3, Coefficients for generalized linear model analysis of plasma HMW adiponectin level in very old women (n=683)
	Estimate	Estimate	Std. Error	t-value	Pr(>|t|)	OR (95%CI)
	(Intercept)	13.2441	0.4334	30.5552	0	564738	(241483.71 - 1320707.90)
	BMI	-1.934	0.2462	-7.8554	0	0.1446	(0.09 - 0.23)
	HDLC	2.4875	0.2729	9.1155	0	12.0311	(7.05 - 20.54)
	CDH13 rs4783244	-2.9816	0.357	-8.3528	0	0.0507	(0.03 - 0.10)
	HBA1c	-0.8596	0.2362	-3.6396	0.0003	0.4233	(0.27 - 0.67)
	NTproBNP	0.851	0.2623	3.2443	0.0012	2.3419	(1.40 - 3.92)
	TG	-0.8685	0.2782	-3.1217	0.0019	0.4196	(0.24 - 0.72)
	LDH	0.7171	0.2397	2.9913	0.0029	2.0485	(1.28 - 3.28)
	ADIPOQ rs11711353	0.9905	0.338	2.9302	0.0035	2.6925	(1.39 - 5.22)
	ALB	-0.6274	0.241	-2.6027	0.0095	0.534	(0.33 - 0.86)
	years_of_education	-0.5555	0.2308	-2.4066	0.0164	0.5738	(0.37 - 0.90)
	FX	0.9051	0.473	1.9134	0.0561	2.4722	(0.98 - 6.25)
	UA	-0.3584	0.2697	-1.3288	0.1844	0.6988	(0.41 - 1.19)
	age2	0.2511	0.2325	1.0802	0.2805	1.2855	(0.82 - 2.03)
	GRIP	-0.2302	0.2485	-0.9261	0.3547	0.7944	(0.49 - 1.29)
	CytC	0.2093	0.2984	0.7013	0.4834	1.2328	(0.69 - 2.21)
	CVD	-0.3154	0.579	-0.5448	0.5861	0.7295	(0.23 - 2.27)
	ALT	-0.1276	0.2392	-0.5336	0.5938	0.8802	(0.55 - 1.41)
	rGTP	-0.1164	0.2353	-0.495	0.6208	0.8901	(0.56 - 1.41)
	CHE	-0.1196	0.242	-0.4941	0.6214	0.8873	(0.55 - 1.43)
	RENAL	-0.2045	0.871	-0.2348	0.8145	0.8151	(0.15 - 4.49)
	IADL_SUM	0.0178	0.2414	0.0738	0.9412	1.018	(0.63 - 1.63)
