# Supplementary material for: Status and physiological significance of circulating adiponectin in the very old and centenarians: an observational study
Source: eLife. 2023 Sep 28;12:e86309. doi: 10.7554/eLife.86309 (PMC10564453; doi:10.7554/eLife.86309)
Supplement: Supplementary file 4. [file elife-86309-supp4.xlsx]

## Sheet: Supplementary File 4
	Supplementary File 4. Coefficients for generalized linear model analysis of plasma HMW adiponectin level in the very old (n=1326)
		Estimate	Std. Error	t-value	Pr(>|t|)	OR (95%CI)
	(Intercept)	10.6987	0.3714	28.8087	0	44297.8	(21392.70 - 91727.44)
	BMI	-1.3138	0.1696	-7.7481	0	0.2688	(0.19 - 0.37)
	HDLC	2.3133	0.1885	12.2694	0	10.1076	(6.98 - 14.63)
	TG	-0.914	0.1841	-4.9639	0	0.4009	(0.28 - 0.58)
	NTproBNP	0.746	0.1649	4.5236	0	2.1085	(1.53 - 2.91)
	LDH	0.8442	0.1605	5.2614	0	2.3262	(1.70 - 3.19)
	CDH13 rs4783244	-2.4361	0.2463	-9.8911	0	0.0875	(0.05 - 0.14)
	ADIPOQ rs11711353	0.7984	0.2281	3.4993	0.0005	2.2219	(1.42 - 3.47)
	ALB	-0.5575	0.1643	-3.3929	0.0007	0.5726	(0.42 - 0.79)
	HBA1c	-0.3955	0.1587	-2.4912	0.0129	0.6734	(0.49 - 0.92)
	CstC	0.4477	0.1889	2.3704	0.0179	1.5647	(1.08 - 2.27)
	gamma GTP	-0.3645	0.1591	-2.2914	0.0221	0.6946	(0.51 - 0.95)
	FX	0.7773	0.3416	2.2757	0.023	2.1757	(1.11 - 4.25)
	Hand Grip	-0.5016	0.2343	-2.1405	0.0325	0.6056	(0.38 - 0.96)
	CHE	-0.3456	0.1706	-2.0254	0.043	0.7078	(0.51 - 0.99)
	sex	0.9358	0.4918	1.9028	0.0573	2.5492	(0.97 - 6.68)
	IADL score	-0.2313	0.1588	-1.4562	0.1456	0.7935	(0.58 - 1.08)
	UA	-0.2606	0.1794	-1.4529	0.1465	0.7706	(0.54 - 1.1)
	Years of education	-0.2312	0.1614	-1.4325	0.1522	0.7936	(0.58 - 1.09)
	Renal disease	0.6989	0.5481	1.2752	0.2025	2.0116	(0.69 - 5.89)
	Age	0.1758	0.1575	1.1159	0.2647	1.1921	(0.88 - 1.62)
