# Supplementary material for: Status and physiological significance of circulating adiponectin in the very old and centenarians: an observational study
Source: eLife. 2023 Sep 28;12:e86309. doi: 10.7554/eLife.86309 (PMC10564453; doi:10.7554/eLife.86309)
Supplement: Supplementary file 5. [file elife-86309-supp5.xlsx]

## Sheet: Supplementary File 5
	Supplementary File 5. Coefficients for generalized linear model analysis of plasma HMW adiponectin level in centenarian men (n=63)
	Estimate	Estimate	Std. Error	t-value	Pr(>|t|)	OR (95%CI)
	(Intercept)	22.9195	1.1899	19.2619	0	8.99 x 109	(8.73 x 108 - 9.26 x 1010)
	CDH13 rs4783244	-5.9466	1.4195	-4.1891	0.0001	2.60 x 103	(0.0002 - 0.0422)
	Age	3.0381	0.9679	3.139	0.0027	20.8663	(3.13 - 139.10)
	HDLC	2.7204	1.0843	2.5089	0.0151	15.187	(1.81 - 127.20)
	SBP	-1.5231	0.9911	-1.5368	0.1301	0.218	(0.031 - 1.52)
	NTproBNP	0.9513	0.9573	0.9937	0.3247	2.5892	(0.40 - 16.90)
	TG	-0.5692	0.9391	-0.6061	0.5469	0.566	(0.090 - 3.57)
	Education	-0.4521	1.0302	-0.4389	0.6625	0.6363	(0.085 - 4.79)
