# Supplementary material for: Status and physiological significance of circulating adiponectin in the very old and centenarians: an observational study
Source: eLife. 2023 Sep 28;12:e86309. doi: 10.7554/eLife.86309 (PMC10564453; doi:10.7554/eLife.86309)
Supplement: Supplementary file 6. [file elife-86309-supp6.xlsx]

## Sheet: Supplementary File 6
	Supplementary File 6. Coefficients for generalized linear model analysis of plasma HMW adiponectin level in centenarian women (n=289)
	Estimate	Estimate	Std. Error	t-value	Pr(>|t|)	OR (95%CI)
	(Intercept)	21.7027	0.8202	26.4591	0	2.66 x 109	(5.34 x 108 - 1.33 x 1010)
	HDLC	4.3146	0.6238	6.9167	0	74.78	(22.02 - 253.96)
	CDH13 rs4783244	-2.3547	1.0146	-2.3209	0.021	0.0949	(0.013 - 0.69)
	TG	-1.387	0.6054	-2.2909	0.0227	0.2498	(0.076 - 0.82)
	age2	1.2801	0.6269	2.0421	0.0421	3.5972	(1.05 - 12.29)
	SBP	-0.8155	0.6075	-1.3424	0.1805	0.4424	(0.14 - 1.46)
	NTproBNP	0.6558	0.5982	1.0964	0.2739	1.9268	(0.60 - 6.22)
	Education	-0.6446	0.5964	-1.0809	0.2807	0.5249	(0.16 - 1.69)
