# Supplementary material for: Status and physiological significance of circulating adiponectin in the very old and centenarians: an observational study
Source: eLife. 2023 Sep 28;12:e86309. doi: 10.7554/eLife.86309 (PMC10564453; doi:10.7554/eLife.86309)
Supplement: Supplementary file 7. [file elife-86309-supp7.xlsx]

## Sheet: Supplementary File 7
	Supplementary File 7. Coefficients for generalized linear model analysis of plasma HMW adiponectin level in centenarian (n=352)
		Estimate	Std. Error	t-value	Pr(>|t|)	OR (95%CI)
	(Intercept)	22.0021	0.7093	31.0207	0	3.59 x 109	(8.95 x 108 - 1.44 x 1010)
	CDH13 rs4783244	3.9495	0.5543	7.125	0	51.9112	(17.52 - 153.85)
	HDLC	-3.141	0.868	-3.6185	0.0003	0.0432	(0.01 - 0.24)
	BMI	1.654	0.5501	3.0068	0.0028	5.2278	(1.78 - 15.37)
	TG	-1.2003	0.5285	-2.2713	0.0237	0.3011	(0.11 - 0.85)
	LDH	-0.9301	0.5313	-1.7508	0.0809	0.3945	(0.14 - 1.12)
	NTproBNP	-0.9021	0.5273	-1.7106	0.0881	0.4057	(0.14 - 1.14)
	ADIPOQ rs11711353	0.8047	0.5186	1.5515	0.1217	2.236	(0.81 - 6.18)
