# Supplementary material for: Status and physiological significance of circulating adiponectin in the very old and centenarians: an observational study
Source: eLife. 2023 Sep 28;12:e86309. doi: 10.7554/eLife.86309 (PMC10564453; doi:10.7554/eLife.86309)
Supplement: Supplementary file 8. [file elife-86309-supp8.xlsx]

## Sheet: Supplementary File 8
	Supplementary File 8. Analysis of variance of plasma HMW adiponectin level by ANOVA in very old men (n=643)
		Df	Deviance	Resid.Df	Resid.Dev	F	Pr(>F)		rho%
	NULL	642	25043
	HDLC	1	3072.05	641	21971	124.309	<2.20E-16	***	0.121684
	BMI	1	1811	640	20160	73.2816	<2.20E-16	***	0.0713288
	CDH13 rs4783244	1	848.14	639	19311.8	34.3199	7.575e-09	***	0.0328805
	CHE	1	687.58	638	18624.2	27.8226	1.837e-07	***	0.0264691
	TG	1	665.54	637	17958.7	26.9308	2.857e-07	***	0.025589
	LDH	1	515.42	636	17443.3	20.8563	5.968e-06	***	0.0195946
	ALB	1	471.97	635	16971.3	19.098	1.455e-05	***	0.0178595
	Hand grip	1	316.97	634	16654.3	12.826	0.0003685	***	0.0116702
	NTproBNP	1	309.44	633	16344.9	12.5216	0.0004322	***	0.0113695
	Renal disease	1	271.2	632	16073.7	10.9739	0.0009775	***	0.00984253
	Age	1	254.23	631	15819.5	10.2875	0.001408	**	0.00916489
	IADL score	1	177.27	630	15642.2	7.1732	0.0075954	**	0.00609178
	ADIPOQ rs11711353	1	102.56	629	15539.6	4.1502	0.0420512	.	0.00310851
	CstC	1	98.24	628	15441.4	3.9754	0.0466053	.	0.00293601
	FX	1	28.18	627	15413.2	1.1404	0.285985		0.000138419
	Years of Education	1	13.15	626	15400.1	0.5321	0.465987		-0.000461748
	UA	1	2.79	625	15397.3	0.1127	0.737171		-0.000312262
	HBA1c	1	0.66	624	15396.6	0.0268	0.869929		-0.000312262
	gamma GTP	1	0.06	623	15396.5	0.0024	0.960904		-0.000312262
									0.368329
