# Supplementary material for: Status and physiological significance of circulating adiponectin in the very old and centenarians: an observational study
Source: eLife. 2023 Sep 28;12:e86309. doi: 10.7554/eLife.86309 (PMC10564453; doi:10.7554/eLife.86309)
Supplement: Supplementary file 9. [file elife-86309-supp9.xlsx]

## Sheet: Supplementary File 9
	Supplementary File 9. Analysis of variance of plasma HMW adiponectin level by ANOVA in VeryOld women (n=683)
		Df	Deviance	Resid.Df	Resid.Dev	F	Pr(>F)		rho%
	NULL	682	40200
	BMI	1	6595.9	681	33604.1	192.477	<2.20E-16	***	0.163225
	HDLC	1	5170.5	680	28433.6	150.882	<2.20E-16	***	0.127767
	CDH13 rs4783244	1	2349.7	679	26083.9	68.5678	6.799e-16	***	0.0575978
	HBA1c	1	1082.8	678	25001.1	31.5961	2.801e-08	***	0.0260829
	LDH	1	475.9	677	24525.2	13.8866	0.0002108	***	0.0109858
	TG	1	467.5	676	24057.7	13.6435	0.0002393	***	0.0107769
	NTproBNP	1	395.3	675	23662.4	11.5341	0.0007243	***	0.00898087
	ADIPOQ rs11711353	1	294.2	674	23368.2	8.586	0.0035044	**	0.00646595
	ALB	1	188.2	673	23180	5.4913	0.0194064	*	0.00382913
	Age	1	142.8	672	23037.2	4.1674	0.0416048	*	0.00269978
	CHE	1	128.5	671	22908.7	3.7502	0.0532271	.	0.00234406
	FX	1	100	670	22808.7	2.9172	0.0881117	.	0.0016351
	Hand grip	1	67.9	669	22740.8	1.9828	0.159563		0.000836596
	Renal disease	1	29.3	668	22711.5	0.8561	0.355167		-0.000129913
	UA	1	28.3	667	22683.2	0.8272	0.363412		-0.000295505
	CytC	1	14.7	666	22668.5	0.429	0.512727		-0.00045357
	CVD	1	10.3	665	22658.2	0.3016	0.583053		-0.000466115
	Years of Education	1	3.8	664	22654.4	0.1099	0.740384		-0.000466115
	IADL_SUM	1	1.4	663	22653	0.0407	0.840133		-0.000466115
	ALT	1	0.8	662	22652.2	0.0222	0.88151		-0.000466115
	gamma GTP	1	0.5	661	22651.7	0.0158	0.899918		-0.000466115
									0.420017
