# Supplementary material for: Status and physiological significance of circulating adiponectin in the very old and centenarians: an observational study
Source: eLife. 2023 Sep 28;12:e86309. doi: 10.7554/eLife.86309 (PMC10564453; doi:10.7554/eLife.86309)
Supplement: Supplementary file 10. [file elife-86309-supp10.xlsx]

## Sheet: Supplementary File 10
	Supplementary File 10. Analysis of variance of plasma HMW adiponectin level by ANOVA in centenarian men (n=63)
		Df	Deviance	Resid. Df	Resid. Dev	F	Pr(>F)		rho%
	NULL	62	4650.9
	CDH13 rs4783244	1	837.85	61	3813.05	17.5486	0.0001022	***	0.169882
	HDLC	1	397.4	60	3415.65	8.3234	0.0055794	**	0.0751803
	age2	1	391.54	59	3024.11	8.2008	0.0059158	**	0.0739203
	SBP	1	308.37	58	2715.74	6.4589	0.0138892	*	0.0560378
	NTproBNP	1	86.96	57	2628.78	1.8213	0.182688		0.00843192
	TG	1	1.65	56	2627.13	0.0346	0.853046		0
	Education	1	1.21	55	2625.92	0.0253	0.874231		0
									0.383453
