# Supplementary material for: Status and physiological significance of circulating adiponectin in the very old and centenarians: an observational study
Source: eLife. 2023 Sep 28;12:e86309. doi: 10.7554/eLife.86309 (PMC10564453; doi:10.7554/eLife.86309)
Supplement: Supplementary file 11. [file elife-86309-supp11.xlsx]

## Sheet: Supplementary File 11
	Supplementary File 11. Analysis of variance of plasma HMW adiponectin level by ANOVA in Centenarian women (n=289)
		Df	Deviance	Resid. Df	Resid. Dev	F	Pr(>F)		rho%
	NULL	288	34284
	HDLC	1	5481.6	287	28802.4	56.2394	8.447e-13	***	0.157045
	TG	1	588.9	286	28213.5	6.0422	0.01457	*	0.0143341
	rs4783244	1	525	285	27688.5	5.3865	0.02101	*	0.0124703
	age2	1	115.3	284	27573.2	1.1832	0.27763		0.000520096
	education	1	83.2	283	27490	0.8534	0.3564		-0.000416201
	NTproBNP	1	63	282	27427	0.6463	0.42212		0
	SBP	1	38.2	281	27388.8	0.3923	0.5316		0
									0.183953
