# Supplementary figures and images for: Status and physiological significance of circulating adiponectin in the very old and centenarians: an observational study
Source: eLife journal article supplement (doi:10.7554/elife.86309), 2023-09-28

non fat tissue

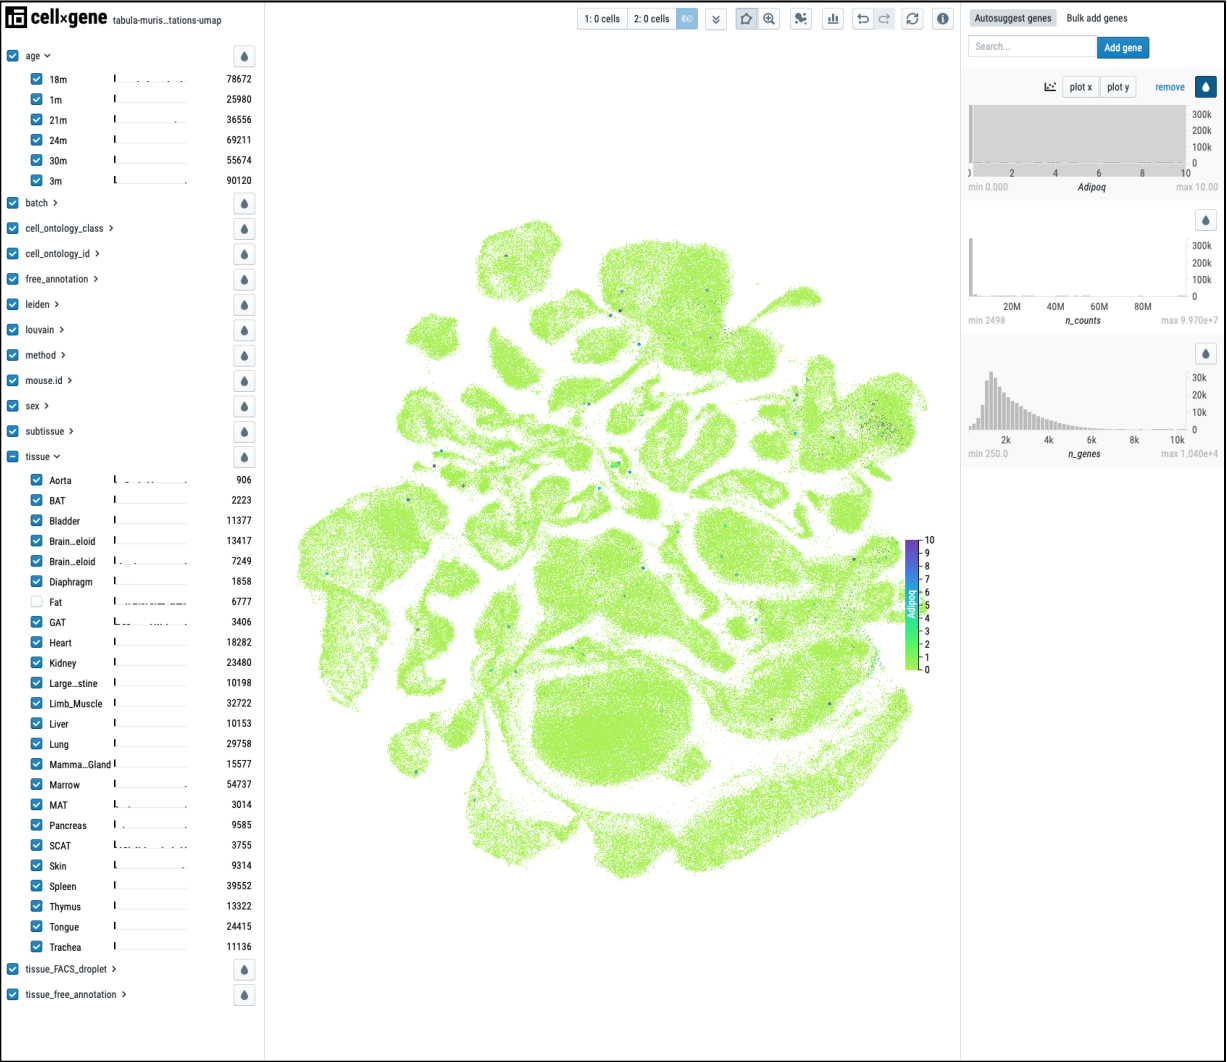

adipose tissue

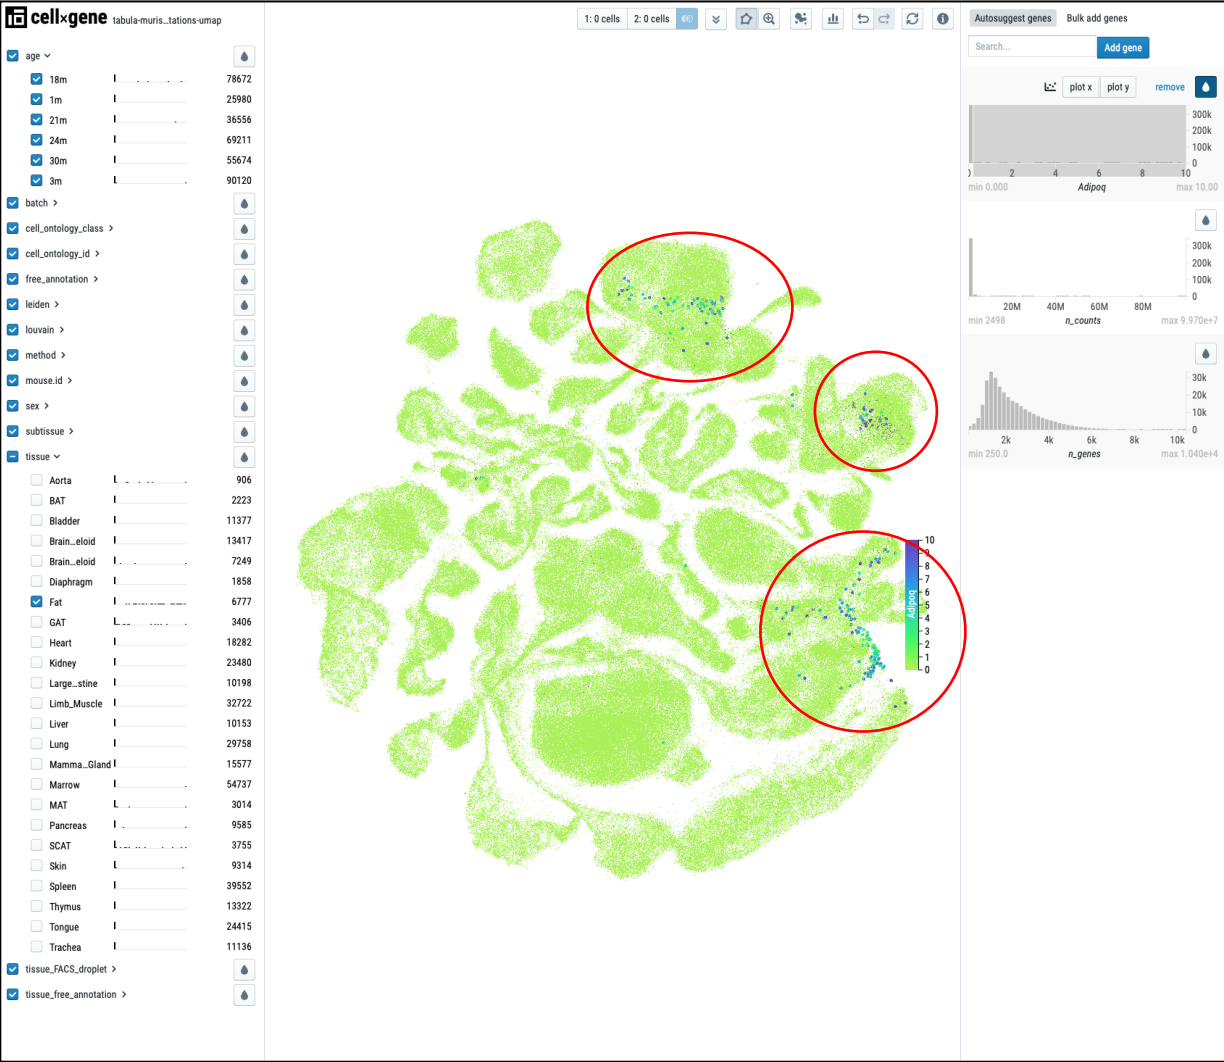

Supplement: supp [file elife-86309-supp-v1.zip]

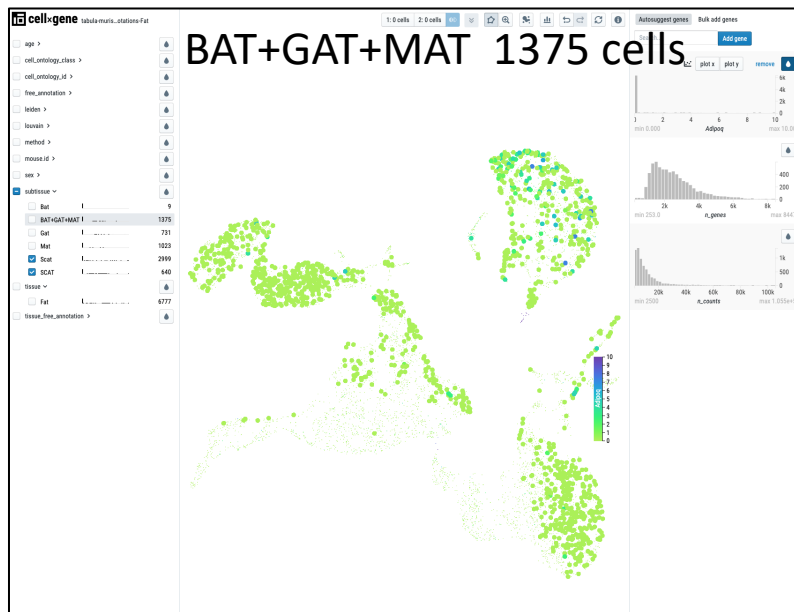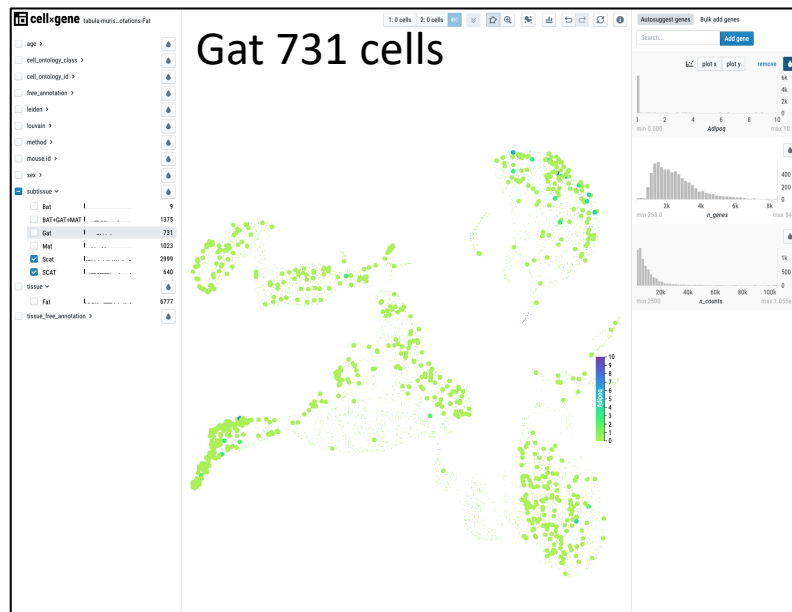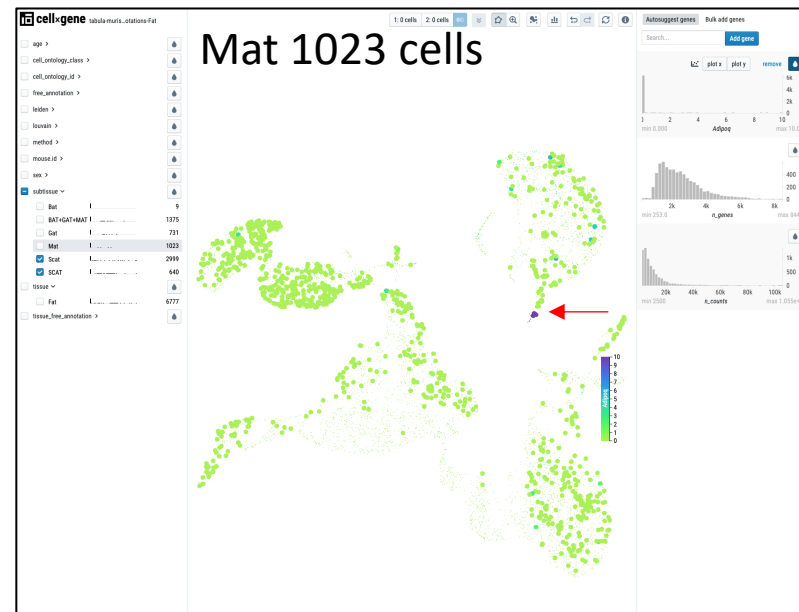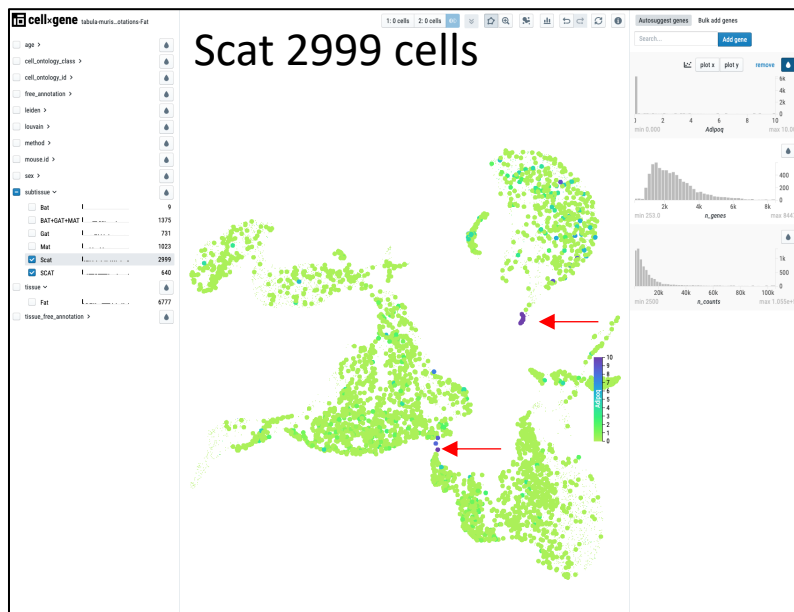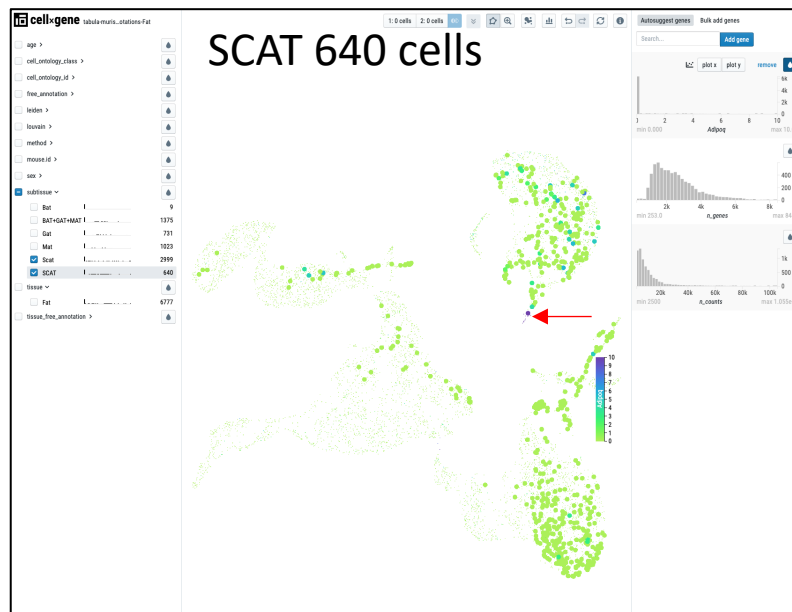

Supplement: supp [file elife-86309-supp-v1.zip]

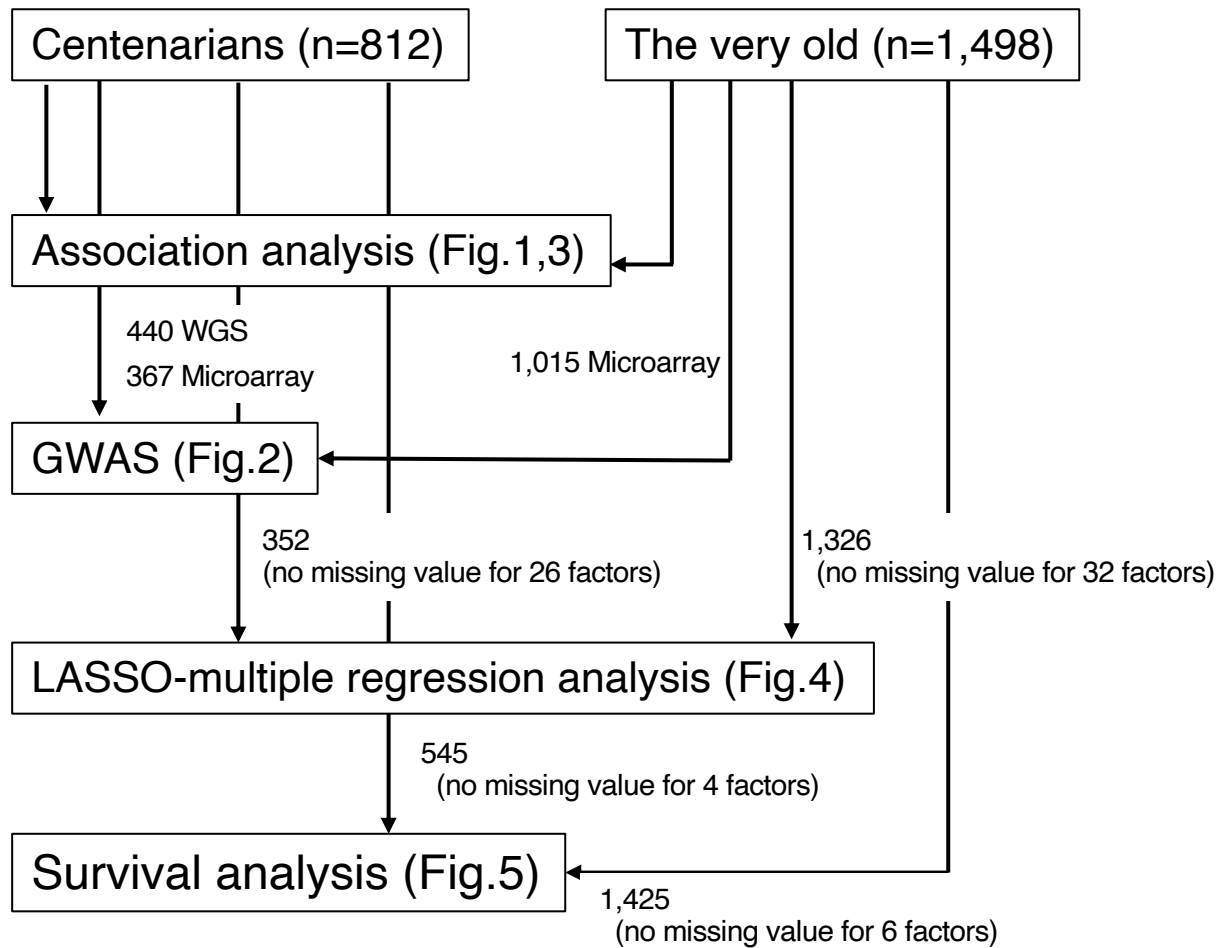

Supplement: supp [file elife-86309-supp-v1.zip]

a, rs4783244 men (CDH13)

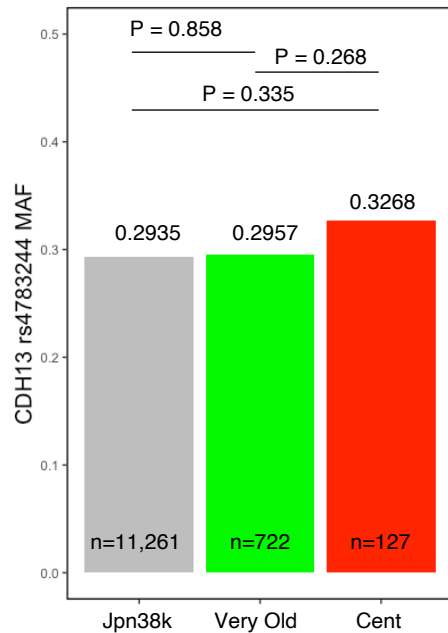

b, rs4783244 women (CDH13)

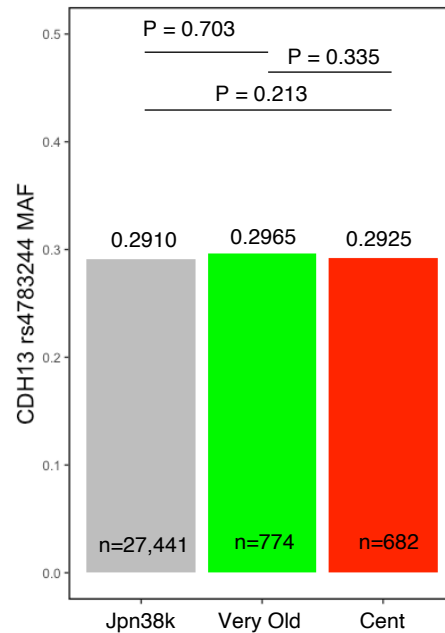

c, rs11711353 men (ADIPOQ)

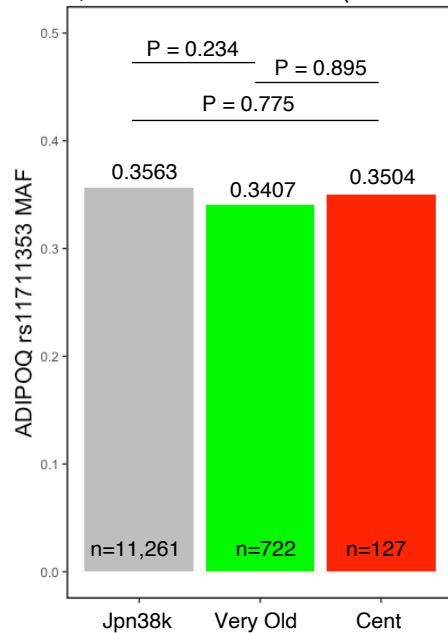

c, rs11711353 women (ADIPOQ)

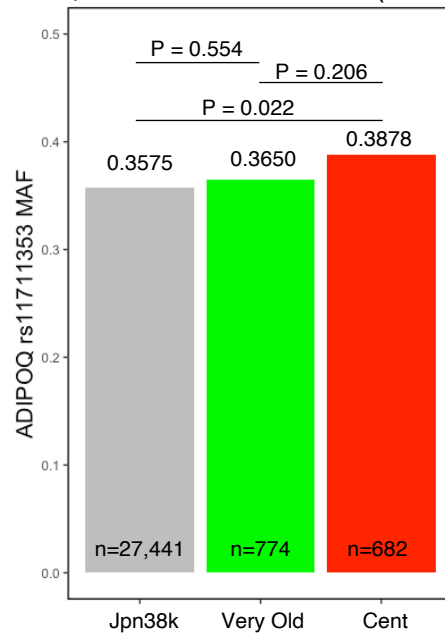

Supplement: supp [file elife-86309-supp-v1.zip]
